# Supplementary material
Source: PubMed Central journal article supplement (PMC2727383)
Supplement: msn129_1.pdf [file msn129_1.pdf]

## Supplementary Material

### Supplemental Text

The cladogram in figure 1 is based on a number of published phylogenetic studies (Andreasen and Bremer 2000; Backlund, Oxelman, and Bremer 2000; Bremer and Manen 2000; Richardson et al. 2000; Anderberg, Rydin, and Kallersjo 2002; Kress, Prince, and Williams 2002; Ronsted et al. 2002; Bremer et al. 2003; Tam et al. 2004; Williams, Kress, and Manos 2004; Albach, Meudt, and Oxelman 2005; Qiu et al. 2005; Schonenberger, Anderberg, and Sytsma 2005; Soltis et al. 2005; Qiu et al. 2006; Tokuoka and Tobe 2006; Davis et al. 2007a; Davis et al. 2007b; Livshultz et al. 2007; Tokuoka 2007).

#### *Families with multiple gains of the *cox1* intron*

Synopses for four of the most complex families for which multiple, within-family intron acquisitions are inferred were provided in the main text. The organismal trees shown in figure 2 are based on the following studies: A. Rhamnaceae (Richardson et al. 2000); B. Apocynaceae (Livshultz et al. 2007); C. Rubiaceae (Andreasen and Bremer 2000; Bremer and Manen 2000; Davis et al. 2007a); D. Plantaginaceae (Ronsted et al. 2002; Albach, Meudt, and Oxelman 2005). Synopses for the remaining five families for which multiple transfers are inferred are provided below; for the first two of these families, we do not invoke any within-family transfers, whereas for the last three we do. Following treatment of these five families, we also fully consider the case of *Hippuris*,

which was briefly treated in the main text within the context of its family, the Plantaginaceae.

**Boraginaceae:** Based on current sampling, this is the simplest to interpret of the nine families with multiple inferred intron acquisitions. Two of the four sampled Boraginaceae taxa, *Ehretia* and *Heliotropium*, have the intron. The two introns are well-separated in the intron phylogeny (fig. 5) and have different length CCTs (fig. 1), making it clear that they were acquired independently and, most likely, from distantly related donors.

**Euphorbiaceae:** We infer five separate transfers to account for the intron's presence in all six Euphorbiaceae examined. The introns from *Croton* and *Codiaeum* clearly trace back to the same transfer event (fig. 5). However, this intron clade and the other four Euphorbiaceae introns are relatively widely separated from one another in the intron phylogeny (fig. 5) and therefore each probably results from a separate transfer, from relatively distantly related donors. Consistent with this hypothesis, three different CCT lengths are found within the family (figs. 1 and 5). *Hevea* and *Euphorbia* are the most likely candidates for having acquired their intron by the same transfer, as they share the same, rare CCT (CCT=5) and are not well separated in the intron phylogeny (fig. 5). However, because *Hura*, the strongly supported sister to *Euphorbia* (Tokuoka 2007), acquired its intron by a clearly independent transfer (fig. 5), it seems more likely that all three plants acquired their introns by separate events. The limited data available for this

species-rich family do not allow us to assess the recency of these events or whether within-family transfers have taken place between closely related species.

**Araceae:** An earlier study (Cho and Palmer 1999) invoked 5 separate intron acquisitions, all but the first from a closely related set of Araceae-like donors, to account for the intron's presence in 6 of 15 Araceae taxa sampled (also see figs. 1 and 5). Although there has been no further sampling of the family (but see Addendum), this inference is strengthened by subsequent phylogenetic study (Tam et al. 2004). In particular, *Zamioculcas* and *Philodendron*, thought previously to be sister taxa (in which case the only evidence for their having acquired the intron independently was their possession of different length CCTs), now appear to be phylogenetically separated by intron- and CCT-lacking taxa (fig. 1).

**Marantaceae:** The six *cox1* introns examined from the monocot family Marantaceae form a well-supported (95% BS) clade of closely related sequences (fig. 5). Relationships within this intron clade are largely unresolved and do not conflict with organismal phylogeny (figs. 1 and 5). Based on intron phylogeny alone, one would assume that these six introns arose by a single, shared transfer event. However, *Monotagma* is separated from the other intron-bearing Marantaceae by no fewer than six intermediate clades that lack both the intron and the corresponding CCT (fig. 1). This pattern strongly supports the hypothesis that *Monotagma* acquired its intron separately from the *Maranta/Ctenanthe/Saranthe* clade. The main text describes at length four

alternative hypotheses to account for the two CCT lengths found within the *Maranta/Ctenanthe/Sarantia* clade.

**Zingiberaceae:** An intron-and CCT-lacking group of two genera (*Curcuma* and *Smithatris*) is nested within a clade of gingers (Zingiberaceae) that otherwise all contain the intron (fig. 1), and whose introns form a strongly supported monophyletic group (fig. 5). Either the intron was acquired once, in the common ancestor of this clade, and then it and its CCT were lost (in the *Curcuma* and *Smithatris* clade), or, as depicted in fig. 1, there were *at least* two separate intron gains and no losses. We emphasize the “at least” here, because, depending on the resolution of the current polytomy for this part of Zingiberaceae phylogeny, more than two transfers might have to be invoked to account for the intron distribution. In addition, *Siphonochilus*, the basal-most member of the Zingiberaceae, contains an intron that almost certainly was acquired independently and from an unrelated donor, as it has a different length CCT (fig. 1), is unrelated in intron phylogeny (fig. 5), and is separated in Zingiberaceae phylogeny by two intron-lacking clades (fig. 1).

**Hippuris (Plantaginaceae):** *Hippuris* not only lacks the *cox1* intron (as do the two *Plantago* clades inferred to have lost it; see main text) but *entirely* lacks the CCT. At least three scenarios could account for this pattern. First, *Hippuris* ancestrally contained the intron and the CCT, but lost them by five independent events, namely, a standard retroprocessing event leading to intron loss and precise substitutional reversion at all four CCT sites. The *Hippuris cox1* coding sequence is not notably divergent (figs. 2 and 4),

and therefore we regard the coincident occurrence of all five events as extremely unlikely. Second, *Hippuris* ancestrally contained the intron and CCT and lost them in a concerted manner via horizontal uptake of an intronless *coxI* gene from *outside* the Plantaginaceae, followed by either loss of the native, intron-containing *coxI* gene or its effective erasure by gene conversion with the foreign intronless-copy. The *coxI* exon phylogeny (fig. 4), though poorly resolved in the relevant portion of the tree, does not provide support for this hypothesis. Third, *Hippuris* never possessed the intron and therefore rather than a single gain of the intron in the family, three separate gains must be invoked – in *Sibthorpia*, in *Callitriche*, and in a large clade comprising most of the rest of the family (fig. 3). Incongruence at the base of the Plantaginaceae between the intron and organismal phylogenies is consistent with this third scenario, i.e., the *Sibthorpia* and *Callitriche* introns are not sisters; rather, *Sibthorpia* nests three steps away, as sister to the *Aragoa* + *Plantago* clade (figs. 3 and 5). If correct, this would suggest that two of the three intron acquisitions in the family occurred via intrafamilial transfer. Although scenario 3 invokes two extra HGTs versus one extra for scenario 2, it is nonetheless more plausible because the probability of transfer of this homing group I intron is far greater than for other elements of the genome (including the *coxI* gene itself), and because the *Sibthorpia* intron is anomalously placed within Plantaginaceae phylogeny.

#### *Coconversion tract length and selection vis-à-vis RNA editing*

Nucleotide position 20 downstream of the *coxI* intron shows an intriguingly complex pattern of variation. This site has been determined experimentally or predicted computationally (Mower, 2006; our unpublished data) to be a site of C→U RNA editing

in numerous angiosperms. This edit changes the corresponding amino acid from proline to leucine. The ancestral and common condition at this site in angiosperm *coxI* genes is clearly C (editing necessary), with most examined plants possessing a T (editing unnecessary) also possessing the *coxI* intron.

All introns with CCT=6 have T at this position. This is as expected under two assumptions, the first of which is that upon its initial arrival in angiosperms the *coxI* intron had T at this position. This could be because the fungal donor supplied the T (many fungi have T at this position) and/or because the initial recipient happened to be one of those relatively rare intronless angiosperms with a T at this position. The second assumption is that each subsequent, within-angiosperm transfer that maintained the CCT=6 state also brought with it nucleotides 19 and 20.

Those introns with CCT=0–3 all have the pre-edited C (fig. 2 and data not shown). This is also as expected, if an occasional transfer is accompanied by an aberrantly short 3' co-conversion event, if all 3' co-conversions have a strict 5'→3' polarity, and if the recipient genes in these rare transfers all had the ancestral C at position 20. Consistent with the last hypothesis is the observation that for all five inferred transfers for which CCT reductions from 6 to 0–3 are inferred, the most closely related intronless plants to those with CCT=0–3 have C at position 20 (data not shown).

What is intriguing, however, is that unlike the CCT=0–3 introns, all introns with CCT=4 or 5 still have the post-edited T at position 20 [fig. 2; note that there are probably only 1-2 transfers each that shortened the CCT from 6 to either 4 or 5 (fig. 5)]. This pattern may reflect selection for efficient RNA editing at position 20. Most of the sequence determinants for proper editing site recognition in plant mitochondria appear to

be located within the 5–20 nt immediately upstream of a particular editing site (Choury and Araya 2006; Mulligan, Chang, and Chou 2007). We posit that the most critical editing site determinants for the site in question are located within the first 10 nt upstream of the site, such that any strictly polar CCT truncations that result in CCT=4 or 5 in a recipient gene bearing the ancestral pre-edited C at position 20 would be sufficiently deleterious to be lost by purifying selection. According to this hypothesis, the only viable CCT=4 or 5 truncations would, most likely, be those cases in which the recipients already have or soon acquire the post-edited T at position 20. Relevant data (i.e., from appropriately related intronless plants) are unavailable for any of the CCT=5 plants. Although the large clade of CCT=4 introns (fig. 5) may have had C present ancestrally at position 20, the small clade composed of five members of the Zingiberaceae probably had T present (data not shown).

### **Literature Cited**

- Albach, D., H. Meudt, and B. Oxelman. 2005. Piecing together the "new" Plantaginaceae. *Am. J. Bot.* **92**:297-315.
- Anderberg, A. A., C. Rydin, and M. Kallersjo. 2002. Phylogenetic relationships in the order Ericales s.l.: analyses of molecular data from five genes from the plastid and mitochondrial genomes. *Am. J. Bot.* **89**:677-687.
- Andreasen, K., and B. Bremer. 2000. Combined phylogenetic analysis in the Rubiaceae-Ixoroideae: morphology, nuclear and chloroplast DNA data. *Am. J. Bot.* **87**:1731-1748.

- Backlund, M., B. Oxelman, and B. Bremer. 2000. Phylogenetic relationships within the Gentianales based on *ndhF* and *rbcL* sequences, with particular reference to the Loganiaceae. *Am. J. Bot.* **87**:1029-1043.
- Bremer, B., K. Bremer, M. W. Chase et al. 2003. An update of the Angiosperm Phylogeny Group classification for the orders and families of flowering plants: APG II. *Bot. J. Linnean Soc.* **141**:399-436.
- Bremer, B., and J. F. Manen. 2000. Phylogeny and classification of the subfamily Rubioideae (Rubiaceae). *Plant Syst. Evol.* **225**.
- Cho, Y., Y. L. Qiu, P. Kuhlman, and J. D. Palmer. 1998. Explosive invasion of plant mitochondria by a group I intron. *Proc. Natl. Acad. Sci. USA* **95**:14244-14249.
- Cho, Y. R., and J. D. Palmer. 1999. Multiple acquisitions via horizontal transfer of a group I intron in the mitochondrial *cox1* gene during evolution of the Araceae family. *Mol. Biol. Evol.* **16**:1155-1165.
- Choury, D., and A. Araya. 2006. RNA editing site recognition in heterologous plant mitochondria. *Curr Genet* **50**:405-416.
- Davis, A., M. Chester, O. Maurin, and M. F. Fay. 2007a. Searching for the relatives of *Coffea* (Rubiaceae, Ixoroideae): the circumscription and phylogeny of *Coffeae* based plastid sequence data and morphology. *Am. J. Bot.* **94**:313-329.
- Davis, C. C., M. Latvis, D. L. Nickrent, K. J. Wurdack, and D. Baum. 2007b. Florar gigantism in *Rafflesiaceae*. *Science* **315**:1812.
- Kress, W., L. Prince, and K. Williams. 2002. The phylogeny and a new classification of the gingers (*Zingiberaceae*): evidence from molecular data. *Am. J. Bot.* **89**:1682-1696.



- Livshultz, T., D. Middleton, M. Endress, and J. Williams. 2007. Phylogeny of Apocynoideae and the APSA clade (Apocynaceae s.l.). *Ann. Missouri Bot. Gard.* **94**:324-359.
- Mulligan, R., K. Chang, and C. Chou. 2007. Computational analysis of RNA editing sites in plant mitochondrial genomes reveals similar information content and a sporadic distribution of editing sites. *Mol. Biol. Evol.* **24**.
- Qiu, Y. L., O. Dombrovskaya, J. Lee et al. 2005. Phylogenetic analyses of basal angiosperms based on nine plastid, mitochondrial, and nuclear genes. *Int. J. Plant Sci.* **166**:815-842.
- Qiu, Y. L., L. Li, B. Wang et al. 2006. The deepest divergences in land plants inferred from phylogenomic evidence. *Proc. Nat. Acad. Sci.* **103**:15511-15516.
- Richardson, J. E., M. F. Fay, Q. C. B. Cronk, D. Bowman, and M. W. Chase. 2000. A phylogenetic analysis of Rhamnaceae using *rbcL* and *trnL-F* plastid DNA sequences. *Am. J. Bot.* **87**:1309-1324.
- Ronsted, N., M. W. Chase, D. Albach, and M. Bello. 2002. Phylogenetic relationships within *Plantago* (Plantaginaceae): evidence from nuclear ribosomal ITS and plastid *trnL-F* sequence data. *Bot. J. Linnean Soc.* **139**:323-338.
- Schonenberger, J., A. A. Anderberg, and K. J. Sytsma. 2005. Molecular phylogenetics and patterns of floral evolution in the Ericales. *Int. J. Plant Sci.* **166**:265-288.
- Soltis, D. E., P. S. Soltis, P. Endress, and M. W. Chase. 2005. Phylogeny and evolution of angiosperms. Sinauer Associates, Inc, Sunderland, MA.

- Tam, S., P. Boyce, T. Upson, D. Barabe, A. Bruneau, F. Forest, and J. Parker. 2004. Intergeneric and infrafamilial phylogeny of subfamily Monosteroideae (Araceae) revealed by chloroplast *trnL-F* sequences. *Am. J. Bot.* **91**:490-498.
- Tokuoka, T. 2007. Molecular phylogenetic analysis of Euphorbiaceae sensu stricto based on plastid and nuclear DNA sequences and ovule and seed character evolution. *J. Plant Res* **120**:511-522.
- Tokuoka, T., and H. Tobe. 2006. Phylogenetic analyses of Malpighiales using plastid and nuclear DNA sequences, with particular reference to the embryology of Euphorbiaceae sens. str. . *J. Plant Res.* **119**:599-616.
- Williams, K., W. Kress, and P. Manos. 2004. The phylogeny, evolution, and classification of the genus *Globba* and tribe Globbeae (Singiberaceae): appendages do matter. *Am. J. Bot.* **91**:100-114.

**Legends:**

**Table S1.** Taxonomic information for all 640 angiosperms for which *coxI* intron presence/absence has been determined. GenBank accession numbers are given for those taxa for which *coxI* sequences are available. “S” and “P” indicate that *coxI* intron presence/absence data come from Southern blots (Cho et al. 1998) and PCR surveys, respectively. New sequences are shown in bold. Asterisks indicate *coxI* intron presence.

**Figure S1.** Diagram summarizing the process of group I intron homing. Horizontal transfer of an intron-bearing *coxI* gene initiates the process. The intron-encoded site-specific endonuclease recognizes and cleaves its target site in the native, intronless *coxI* gene. Exonucleolytic degradation activates the double-strand-break-repair system of the cell, with the foreign copy of *coxI* used as a template to repair the native one, resulting in a chimeric intron-bearing *coxI* gene.

**Figure S2.** Nucleotide alignment of the exonic regions flanking the *coxI* intron insertion site (42 nt from 3' end of exon 1 and 48 nt from 5' end of exon 2) from virtually all sequenced angiosperm *coxI* genes.

**Figure S3.** Cladogram of angiosperm relationships depicted in Figure 1, including character state for intron presence (character 1) and CCT (co-conversion tract) presence (character 2; CCT=1-6 coded as present).

**Table S1. Taxonomic information for all 640 angiosperms for which cox1 intron presence/absence has been determined**

| Intron?         | Order           | Family            | Species Name                   | GenBank<br>Accession | Number <sup>a</sup> |
|-----------------|-----------------|-------------------|--------------------------------|----------------------|---------------------|
| <b>Asterids</b> |                 |                   |                                |                      |                     |
|                 | Apiales         | Apiaceae          | Daucus carota                  | AY820131             |                     |
|                 | Apiales         | Araliaceae        | Hedera helix                   |                      | S                   |
| *               | Apiales         | Araliaceae        | Hydrocotyle rotundifolia       | AJ223424             |                     |
|                 | Apiales         | Araliaceae        | Polyscias sp.                  |                      | P                   |
|                 | Apiales         | Araliaceae        | Schefflera actinophylla        |                      | S                   |
|                 | Apiales         | Myodocarpaceae    | Delabrea harmsi                |                      | P                   |
|                 | Apiales         | Myodocarpaceae    | Myodocarpus pinnatus           |                      | P                   |
|                 | Apiales         | Pittosporaceae    | Pittosporum tobira             |                      | S                   |
| *               | Aquifoliales    | Aquifoliaceae     | Ilex sp. Qiu 94038             | AJ223429             |                     |
|                 | Aquifoliales    | Cardiopteridaceae | Citronella sarmentosa          |                      | P                   |
|                 | Asterales       | Asteraceae        | Helianthus annuus              |                      | S                   |
|                 | Asterales       | Asteraceae        | Lactuca sativa                 |                      | S                   |
|                 | Asterales       | Calyceraceae      | Calycera sympaganthera         |                      | S                   |
|                 | Asterales       | Campanulaceae     | Lobelia laxifolia              |                      | S                   |
|                 | Asterales       | Campanulaceae     | Platycodon grandiflora         |                      | S                   |
|                 | Asterales       | Campanulaceae     | Prismatocarpus fruticosus      |                      | S                   |
|                 | Asterales       | Campanulaceae     | Trachelium cesuleum            |                      | S                   |
|                 | Asterales       | Goodeniaceae      | Goodenia ovata                 | AY053575             |                     |
|                 | Asterales       | Menyanthaceae     | Menyanthes trifoliata          |                      | S                   |
|                 | Cornales        | Cornaceae         | Alangium platanifolium         |                      | S                   |
|                 | Cornales        | Cornaceae         | Cornus foemina                 |                      | S                   |
|                 | Cornales        | Cornaceae         | Davidia involucrata            |                      | S                   |
|                 | Cornales        | Hydrangeaceae     | Deutzia gracilia               |                      | S                   |
|                 | Cornales        | Hydrangeaceae     | Hydrangea arborescens          |                      | S                   |
|                 | Cornales        | Loasaceae         | Eucnide hirta                  |                      | S                   |
|                 | Cornales        | Nyssaceae         | Camptotheca acuminata          |                      | S                   |
|                 | Dipsacales      | Adoxaceae         | Sambucus canadensis            | AF193965             |                     |
|                 | Dipsacales      | Adoxaceae         | Viburnum sp.                   |                      | S                   |
|                 | Dipsacales      | Caprifoliaceae    | Lonicera sp.                   |                      | S                   |
|                 | Dipsacales      | Dipsacaceae       | Dipsacus sp.                   |                      | S                   |
|                 | Ericales        | Balsaminaceae     | Impatiens pallida              |                      | S                   |
|                 | Ericales        | Clethraceae       | Clethra barbineivis            |                      | S                   |
|                 | Ericales        | Cyrillaceae       | Cyrilla racemiflora            |                      | S                   |
| *               | Ericales        | Ebenaceae         | Diospyros virginiana           | AJ223417             |                     |
|                 | <b>Ericales</b> | <b>Ericaceae</b>  | <b>Andromeda glaucophylla</b>  | <b>EU156501</b>      | <b>S</b>            |
|                 | <b>Ericales</b> | <b>Ericaceae</b>  | <b>Chamaedaphne calyculata</b> | <b>EU156502</b>      | <b>S</b>            |
| *               | Ericales        | Ericaceae         | Pyrola secunda                 | AJ247582             |                     |
| *               | Ericales        | Ericaceae         | Pyrola rotundifolia            |                      | S                   |
|                 | Ericales        | Fouquieriaceae    | Idria columnaris               |                      | S                   |
| *               | Ericales        | Lecythidaceae     | Barringtonia asiatica          | AJ247581             |                     |
|                 | Ericales        | Myrsinaceae       | Ardisia sp.                    |                      | S                   |
|                 | Ericales        | Myrsinaceae       | Rapanea citrifolia             |                      | P                   |
|                 | Ericales        | Myrsinaceae       | Tapeinosperma viellardii       |                      | P                   |
|                 | Ericales        | Polemoniaceae     | Phlox paniculata               | AY053576             |                     |
|                 | Ericales        | Primulaceae       | Primula vulgaris               |                      | S                   |
|                 | Ericales        | Sapotaceae        | Achras zapota                  |                      | S                   |
|                 | Ericales        | Sapotaceae        | Planchonella rufocostata       |                      | P                   |
|                 | Ericales        | Sarraceniaceae    | Heliamphora heterodoxa         | AY600113             |                     |
|                 | Ericales        | Sarraceniaceae    | Sarracenia flava               |                      | S                   |
|                 | Ericales        | Styracaceae       | Halesia carolina               |                      | S                   |
| *               | Ericales        | Symplocaceae      | Symplocos paniculata           | AJ223435             |                     |
|                 | Ericales        | Theaceae          | Camellia sinensis              |                      | S                   |

|   |                    |                     |                                                         |                         |
|---|--------------------|---------------------|---------------------------------------------------------|-------------------------|
|   | Garryales          | Aucubaceae          | Aucuba japonica var. variegata                          | S                       |
|   | Garryales          | Eucommiaceae        | Eucommia ulmoides                                       | S                       |
| * | <b>Gentianales</b> | <b>Apocynaceae</b>  | <b>Alstonia plumosa (JM3105)</b>                        | <b>EU069541 P</b>       |
| * | <b>Gentianales</b> | <b>Apocynaceae</b>  | <b>Alyxia loeseneriana (IND-PK429)</b>                  | <b>EU069542 P</b>       |
|   | <b>Gentianales</b> | <b>Apocynaceae</b>  | <b>Carissa sp.</b>                                      | <b>EU156496 S</b>       |
| * | Gentianales        | Apocynaceae         | Hoya lanceolata                                         | AJ247588                |
| * | <b>Gentianales</b> | <b>Apocynaceae</b>  | <b>Neisosperma brevituba (IND-JM3240)</b>               | <b>EU069543 P</b>       |
| * | Gentianales        | Apocynaceae         | Nerium oleander                                         | AJ223431                |
| * | <b>Gentianales</b> | <b>Apocynaceae</b>  | <b>Ochrosia elliptica (IND-JM3241)</b>                  | <b>EU069544 P</b>       |
| * | Gentianales        | Apocynaceae         | Vinca rosea                                             | AJ223423                |
|   | <b>Gentianales</b> | <b>Gentianaceae</b> | <b>Nymphoides peltatum</b>                              | <b>EU156493</b>         |
|   | Gentianales        | Loganiaceae         | Neuburgia neocaledonica                                 | P                       |
| * | Gentianales        | Loganiaceae         | Strychnos spinosa                                       | AJ247596                |
|   | <b>Gentianales</b> | <b>Rubiaceae</b>    | <b>Asperula sp.</b>                                     | <b>EU156514</b>         |
|   | <b>Gentianales</b> | <b>Rubiaceae</b>    | <b>Bertiera laxissima (Kew Ref. No. 22347)</b>          | <b>EU156533</b>         |
|   | <b>Gentianales</b> | <b>Rubiaceae</b>    | <b>Calochone redingii (Kew Ref. No. 3355)</b>           | <b>EU156534</b>         |
| * | <b>Gentianales</b> | <b>Rubiaceae</b>    | <b>Calycosiphonia macrochlamys (Kew Ref. No. 22359)</b> | <b>EU156532</b>         |
| * | Gentianales        | Rubiaceae           | Coffea arabica                                          | AJ247586                |
| * | <b>Gentianales</b> | <b>Rubiaceae</b>    | <b>Coffea magnistipula (Kew Ref. No. 22350)</b>         | <b>EU156530</b>         |
|   | <b>Gentianales</b> | <b>Rubiaceae</b>    | <b>Crucianella sp.</b>                                  | <b>EU156515</b>         |
|   | <b>Gentianales</b> | <b>Rubiaceae</b>    | <b>Galium sp.</b>                                       | <b>EU156498 S</b>       |
|   | <b>Gentianales</b> | <b>Rubiaceae</b>    | <b>Gardenia</b>                                         | <b>short sequence P</b> |
|   | Gentianales        | Rubiaceae           | <b>Hyperacanthus grevei (Kew Ref. No. 22346)</b>        | <b>short sequence P</b> |
| * | <b>Gentianales</b> | <b>Rubiaceae</b>    | <b>Ixora sp (Kew Ref. No. 21361)</b>                    | <b>EU156535</b>         |
| * | Gentianales        | Rubiaceae           | Ixora sp. Qiu95051                                      | AJ247587                |
|   | <b>Gentianales</b> | <b>Rubiaceae</b>    | <b>Pentas sp.</b>                                       | <b>EU156516</b>         |
| * | <b>Gentianales</b> | <b>Rubiaceae</b>    | <b>Psilanthus melanocarpus (Kew Ref. No. 22353)</b>     | <b>EU156531</b>         |
|   | Gentianales        | Rubiaceae           | Psychotria pancheri                                     | P                       |
|   | <b>Gentianales</b> | <b>Rubiaceae</b>    | <b>Scyphiphora hydrophyllaceae (Kew Ref. No. 20032)</b> | <b>short sequence P</b> |
| * | Lamiales           | Acanthaceae         | Barleria prionitis                                      | AJ247601                |
| * | Lamiales           | Acanthaceae         | Justicia americana                                      | AJ247602                |
| * | Lamiales           | Acanthaceae         | Sanchezia nobilis                                       | AJ223437                |
| * | Lamiales           | Acanthaceae         | Thunbergia erecta                                       | AJ247603                |
|   | <b>Lamiales</b>    | <b>Bignoniaceae</b> | <b>Campsis grandiflora</b>                              | <b>EU156495 S</b>       |
| * | Lamiales           | Bignoniaceae        | Catalpa fargesii                                        | AJ223411                |
|   | Lamiales           | Bignoniaceae        | Deplanchea speciosa                                     | P                       |
|   | <b>Lamiales</b>    | <b>Bignoniaceae</b> | <b>Pandorea jasminoides</b>                             | <b>EU156510</b>         |
|   | <b>Lamiales</b>    | <b>Bignoniaceae</b> | <b>Tecomaria capensis</b>                               | <b>EU156512</b>         |
|   | Lamiales           | Byblidaceae         | Byblis liniflora                                        | AY600112                |
| * | Lamiales           | Calceolariaceae     | Calceolaria sp.                                         | AJ247585                |
|   | Lamiales           | Gesneriaceae        | Coronanthera sp.                                        | P                       |
| * | Lamiales           | Gesneriaceae        | Drymonia serrulata                                      | AJ247579                |
| * | Lamiales           | Gesneriaceae        | Nematanthus hirsutus                                    | AJ247578                |
|   | <b>Lamiales</b>    | <b>Gesneriaceae</b> | <b>Streptocarpus</b>                                    | <b>EU156506</b>         |
| * | Lamiales           | Lamiaceae           | Ajuga reptans                                           | AJ247595                |
|   | <b>Lamiales</b>    | <b>Lamiaceae</b>    | <b>Callicarpa sp.</b>                                   | <b>EU156520</b>         |
| * | Lamiales           | Lamiaceae           | Clerodendrum trichotomum                                | AJ223414                |
| * | Lamiales           | Lamiaceae           | Lamium sp. Qiu 95019                                    | AJ223428                |
| * | <b>Lamiales</b>    | <b>Lamiaceae</b>    | <b>Oxera sp. (JM3229)</b>                               | <b>EU069545 P</b>       |
| * | Lamiales           | Lamiaceae           | Physostegia virginiana                                  | AJ247594                |
| * | Lamiales           | Lamiaceae           | Scutellaria mociniana                                   | AJ247593                |
| * | Lamiales           | Lentibulariaceae    | Genlisea aurea                                          | AY600088                |
| * | Lamiales           | Lentibulariaceae    | Genlisea_hispidula                                      | AY600089                |
| * | Lamiales           | Lentibulariaceae    | Genlisea_violacea                                       | AY600090                |
| * | Lamiales           | Lentibulariaceae    | Pinguicula ehlersiae                                    | AF482514                |
| * | Lamiales           | Lentibulariaceae    | Pinguicula_gracilis                                     | AF482515                |
| * | Lamiales           | Lentibulariaceae    | Pinguicula_grandiflora                                  | AF482516                |

|   |                 |                       |                                             |                         |
|---|-----------------|-----------------------|---------------------------------------------|-------------------------|
| * | Lamiales        | Lentibulariaceae      | Pinguicula_gypsicola                        | AF482517                |
| * | Lamiales        | Lentibulariaceae      | Pinguicula_sp._Jobson_240                   | AY600087                |
| * | Lamiales        | Lentibulariaceae      | Utricularia_adpressa                        | AF482518                |
| * | Lamiales        | Lentibulariaceae      | Utricularia_alpina                          | AF482519                |
| * | Lamiales        | Lentibulariaceae      | Utricularia_asplundii                       | AY600091                |
| * | Lamiales        | Lentibulariaceae      | Utricularia_biloba                          | AY600092                |
| * | Lamiales        | Lentibulariaceae      | Utricularia_caerulea                        | AY600093                |
| * | Lamiales        | Lentibulariaceae      | Utricularia_costata                         | AY600094                |
| * | Lamiales        | Lentibulariaceae      | Utricularia_dichotoma                       | AY600095                |
| * | Lamiales        | Lentibulariaceae      | Utricularia_flaccida                        | AY600096                |
| * | Lamiales        | Lentibulariaceae      | Utricularia_geminiscapa                     | AF482520                |
| * | Lamiales        | Lentibulariaceae      | Utricularia_gibba                           | AY600097                |
| * | Lamiales        | Lentibulariaceae      | Utricularia_longifolia                      | AY600098                |
| * | Lamiales        | Lentibulariaceae      | Utricularia_meyeri                          | AY600099                |
| * | Lamiales        | Lentibulariaceae      | Utricularia_multifida                       | AY600100                |
| * | Lamiales        | Lentibulariaceae      | Utricularia_myriocista                      | AY600101                |
| * | Lamiales        | Lentibulariaceae      | Utricularia_neottioidea                     | AY600102                |
| * | Lamiales        | Lentibulariaceae      | Utricularia_olivacea                        | AY600103                |
| * | Lamiales        | Lentibulariaceae      | Utricularia_pubescens                       | AY128568                |
| * | Lamiales        | Lentibulariaceae      | Utricularia_striatula                       | AY600104                |
| * | Lamiales        | Lentibulariaceae      | Utricularia_subulata                        | AY600105                |
| * | Lamiales        | Lentibulariaceae      | Utricularia_triloba                         | AF482521                |
| * | Lamiales        | Lentibulariaceae      | Utricularia_violacea                        | AY600106                |
|   | Lamiales        | Oleaceae              | Forsythia sp.                               | S                       |
| * | Lamiales        | Oleaceae              | Jasminum polyanthum                         | AJ247607                |
|   | Lamiales        | Oleaceae              | Olea europaea                               | AF288707                |
|   | Lamiales        | Oleaceae              | Syringa sp.                                 | S                       |
| * | Lamiales        | Paulowniaceae         | Paulownia tomentosa                         | AJ247592                |
| * | Lamiales        | Pedaliaceae           | Sesamum indicum                             | AJ247598                |
|   | <b>Lamiales</b> | <b>Plantaginaceae</b> | <b>Antirrhinum</b>                          | <b>short sequence P</b> |
| * | Lamiales        | Plantaginaceae        | Aragoa abietina (Kew Ref. No. 12226)        | <b>EU069508</b>         |
| * | Lamiales        | Plantaginaceae        | Aragoa cundinmarcensis (Kew Ref. No. 11177) | <b>EU069509</b>         |
| * | Lamiales        | Plantaginaceae        | Callitriche heterophylla                    | AJ247577                |
| * | Lamiales        | Plantaginaceae        | Callitriche stagnalis (Kew Ref. No. 11052)  | <b>short sequence P</b> |
|   | Lamiales        | Plantaginaceae        | Cymbalaria                                  | <b>EU156509</b>         |
| * | Lamiales        | Plantaginaceae        | Digitalis purpurea                          | AJ223415                |
| * | Lamiales        | Plantaginaceae        | Hebe subalpina                              | AJ223419                |
|   | Lamiales        | Plantaginaceae        | Hippuris vulgaris (Kew Ref. No. 11538)      | <b>EU069539</b>         |
| * | Lamiales        | Plantaginaceae        | Plantago albicans (Kew Ref. No. 9442)       | <b>EU069510</b>         |
| * | Lamiales        | Plantaginaceae        | Plantago alpina (Kew Ref. No. 9401)         | <b>EU069511</b>         |
| * | Lamiales        | Plantaginaceae        | Plantago amplexicaulis (Kew Ref. No. 9429)  | <b>EU069512</b>         |
| * | Lamiales        | Plantaginaceae        | Plantago arenaria (Kew Ref. No. 9390)       | <b>EU069513</b>         |
|   | Lamiales        | Plantaginaceae        | Plantago aristata (Kew Ref. No. 9440)       | <b>EU069514</b>         |
| * | Lamiales        | Plantaginaceae        | Plantago atrata                             | <b>EU069536</b>         |
|   | Lamiales        | Plantaginaceae        | Plantago australis                          | AJ389608                |
|   | Lamiales        | Plantaginaceae        | Plantago bellardi (Kew Ref. No. 9633)       | <b>EU069515</b>         |
| * | Lamiales        | Plantaginaceae        | Plantago coronopus                          | AJ389609                |
| * | Lamiales        | Plantaginaceae        | Plantago crassifolia (Kew Ref. No. 9393)    | <b>EU069516</b>         |
|   | Lamiales        | Plantaginaceae        | Plantago cretica (Kew Ref. No. 9583)        | <b>EU069517</b>         |
|   | Lamiales        | Plantaginaceae        | Plantago erecta (Kew Ref. No. 9450)         | <b>EU069518</b>         |
| * | Lamiales        | Plantaginaceae        | Plantago lagopus (Kew Ref. No. 9433)        | <b>EU069519</b>         |
| * | Lamiales        | Plantaginaceae        | Plantago lanceolata                         | <b>EU069537</b>         |
| * | Lamiales        | Plantaginaceae        | Plantago macrorhiza (Kew Ref. No. 9614)     | <b>EU069520</b>         |
|   | Lamiales        | Plantaginaceae        | Plantago major (Kew Ref. No. 11185)         | <b>EU069521</b>         |
| * | Lamiales        | Plantaginaceae        | Plantago maritima (Kew Ref. No. 9432)       | <b>EU069522</b>         |
|   | Lamiales        | Plantaginaceae        | Plantago maxima (Kew Ref. No. 11181)        | <b>EU069523</b>         |
|   | Lamiales        | Plantaginaceae        | Plantago media                              | AJ389605                |

|                      |                |                  |                                                  |                |   |
|----------------------|----------------|------------------|--------------------------------------------------|----------------|---|
| *                    | Lamiales       | Plantaginaceae   | <b>Plantago nivalis (Kew Ref. No. 9422)</b>      | short sequence | P |
| *                    | Lamiales       | Plantaginaceae   | <b>Plantago ovata (Kew Ref. No. 9631)</b>        | EU069524       |   |
|                      | Lamiales       | Plantaginaceae   | <b>Plantago palmata (Kew Ref. No. 9396)</b>      | EU069525       |   |
|                      | Lamiales       | Plantaginaceae   | <b>Plantago raoulli (Kew Ref. No. 9428)</b>      | EU069526       |   |
|                      | Lamiales       | Plantaginaceae   | <b>Plantago reniformis (Kew Ref. No. 9446)</b>   | EU069527       |   |
|                      | Lamiales       | Plantaginaceae   | Plantago rigida                                  | AJ389607       |   |
|                      | Lamiales       | Plantaginaceae   | Plantago rugelii                                 | AJ389606       |   |
| *                    | Lamiales       | Plantaginaceae   | <b>Plantago sarcophylla (Kew Ref. No. 9444)</b>  | EU069528       |   |
| *                    | Lamiales       | Plantaginaceae   | <b>Plantago sempervirens</b>                     | EU069538       |   |
|                      | Lamiales       | Plantaginaceae   | Plantago sericea                                 | AJ389613       |   |
| *                    | Lamiales       | Plantaginaceae   | <b>Plantago serraria (Kew Ref. No. 9613)</b>     | EU069529       |   |
|                      | Lamiales       | Plantaginaceae   | <b>Plantago spathulata (Kew Ref. No. 9584)</b>   | EU069530       |   |
| *                    | Lamiales       | Plantaginaceae   | <b>Plantago subspatulata (Kew Ref. No. 9431)</b> | EU069531       |   |
|                      | Lamiales       | Plantaginaceae   | <b>Plantago tenuiflora (Kew Ref. No. 11186)</b>  | EU069532       |   |
|                      | Lamiales       | Plantaginaceae   | <b>Plantago tomentosa (Kew Ref. No. 11182)</b>   | EU069533       |   |
|                      | Lamiales       | Plantaginaceae   | <b>Plantago trinitatis (Kew Ref. No. 9612)</b>   | EU069534       |   |
|                      | Lamiales       | Plantaginaceae   | <b>Plantago uniglumis (Kew Ref. No. 9449)</b>    | EU069535       |   |
| *                    | Lamiales       | Plantaginaceae   | <b>Sibthorpia peregrina (Kew Ref. No. 9180)</b>  | EU069540       |   |
| *                    | Lamiales       | Plantaginaceae   | Veronica catenata                                | AJ223427       |   |
|                      | Lamiales       | Scrophulariaceae | <b>Buddleja lindleyana</b>                       | EU1565308      | S |
| *                    | Lamiales       | Scrophulariaceae | Celsia arturus                                   | AJ247590       |   |
|                      | Lamiales       | Scrophulariaceae | <b>Myoporum parvifolium</b>                      | EU156511       | S |
| *                    | Lamiales       | Scrophulariaceae | Scrophularia nodosa                              | AJ247591       |   |
|                      | Lamiales       | Scrophulariaceae | <b>Verbascum</b>                                 | EU156513       |   |
| *                    | Lamiales       | Unplaced         | Rehmannia glutinosa                              | AJ247589       |   |
|                      | Lamiales       | Verbenaceae      | <b>Petrea valubilis</b>                          | EU156503       | S |
| *                    | Solanales      | Convolvulaceae   | <b>Ipomoea sp.</b>                               | EU156517       |   |
|                      | Solanales      | Solanaceae       | Capsicum annuum                                  |                | S |
|                      | Solanales      | Solanaceae       | Dubosia myoporoides                              |                | P |
|                      | Solanales      | Solanaceae       | Nicotiana tabacum                                | BA000042       |   |
|                      | Solanales      | Solanaceae       | Petunia x hybrida                                |                | S |
|                      | Solanales      | Solanaceae       | Solanum commersonii                              | AJ582177       |   |
|                      | Solanales      | Solanaceae       | Solanum lycopersicum                             | X54738         |   |
|                      | Solanales      | Solanaceae       | Solanum tuberosum                                | X83206         |   |
|                      | Unplaced       | Boraginaceae     | <b>Borago officinalis</b>                        | EU156518       |   |
|                      | Unplaced       | Boraginaceae     | <b>Brunnera macrophylla</b>                      | EU156519       |   |
| *                    | Unplaced       | Boraginaceae     | Ehretia anacua                                   | AJ247606       |   |
| *                    | Unplaced       | Boraginaceae     | Heliotropium arborescens                         | AJ223425       |   |
| <b>Caryophyllids</b> |                |                  |                                                  |                |   |
|                      | Caryophyllales | Aizoaceae        | Oscularia sp.                                    |                | S |
|                      | Caryophyllales | Amaranthaceae    | Beta vulgaris subsp. vulgaris                    | X57693         |   |
|                      | Caryophyllales | Amaranthaceae    | Celosia cristata                                 |                | S |
|                      | Caryophyllales | Amaranthaceae    | Chenopodium sp.                                  |                | S |
|                      | Caryophyllales | Amaranthaceae    | Spinacia sp. CLP-2006                            | DQ317033       |   |
|                      | Caryophyllales | Cactaceae        | Notocactus leninghausii                          |                | S |
|                      | Caryophyllales | Cactaceae        | Pereskia grandifolia                             |                | S |
|                      | Caryophyllales | Caryophyllaceae  | Dianthus deltoides                               |                | S |
|                      | Caryophyllales | Caryophyllaceae  | Gypsophila repens                                | EF547217       |   |
|                      | Caryophyllales | Caryophyllaceae  | Silene acaulis                                   | EF547218       |   |
|                      | Caryophyllales | Caryophyllaceae  | Silene latifolia                                 | EF547221       |   |
|                      | Caryophyllales | Caryophyllaceae  | Silene noctiflora                                | EF547222       |   |
|                      | Caryophyllales | Caryophyllaceae  | Stellaria sp. Qiu                                | EF547228       |   |
| *                    | Caryophyllales | Droseraceae      | Dionaea muscipula                                | AY600108       |   |
|                      | Caryophyllales | Molluginaceae    | Mollugo verticillata                             |                | S |
|                      | Caryophyllales | Nyctaginaceae    | Bougainvillea sp.                                |                | S |
|                      | Caryophyllales | Nyctaginaceae    | Pisonia sp.                                      |                | P |
|                      | Caryophyllales | Phytolaccaceae   | Phytolacca americana                             |                | S |

|        |                     |                      |                                          |                       |          |
|--------|---------------------|----------------------|------------------------------------------|-----------------------|----------|
|        | Caryophyllales      | Plumbaginaceae       | Plumbago sp. CLP-2006                    | DQ317032              |          |
|        | Caryophyllales      | Polygonaceae         | Polygonum sp.                            |                       | S        |
|        | Caryophyllales      | Portulacaceae        | Portulaca sp.                            |                       | S        |
|        | Caryophyllales      | Simmondsiaceae       | Simmondsia californica                   |                       | S        |
|        | Caryophyllales      | Stenospermataceae    | Stenosperma halimifolia                  |                       | S        |
|        | Caryophyllales      | Tamaricaceae         | Tamarix sp.                              |                       | S        |
| <hr/>  |                     |                      |                                          |                       |          |
| Rosids |                     |                      |                                          |                       |          |
|        | Brassicales         | Brassicaceae         | Arabidopsis thaliana                     | X94583                |          |
|        | Brassicales         | Brassicaceae         | Brassica chinensis                       |                       | S        |
|        | Brassicales         | Brassicaceae         | Brassica juncea                          | AY300014              |          |
|        | Brassicales         | Brassicaceae         | Brassica napus                           | AP006444              |          |
|        | Brassicales         | Brassicaceae         | Cardamine sp.                            |                       | S        |
|        | Brassicales         | Brassicaceae         | Raphanus sativus                         | X57692                |          |
|        | Brassicales         | Caricaceae           | Carica papaya                            |                       | S        |
| *      | Celastrales         | Celastraceae         | Brexia madagascariensis                  | AJ223413              |          |
|        | Celastrales         | Celastraceae         | Euonymus sp                              |                       | S        |
|        | Celastrales         | Celastraceae         | Salaciopsis tiwakae                      |                       | P        |
|        | Celastrales         | Hippocrateaceae      | Dicarpellum baillonianum                 |                       | P        |
|        | Celastrales         | Hippocrateaceae      | Dicarpellum pancheri                     |                       | P        |
|        | Crossosomatales     | Crossosomataceae     | Crossosoma bigelovii                     | DQ317034              |          |
|        | Crossosomatales     | Staphyleaceae        | Staphylea trifolia                       |                       | S        |
|        | Cucurbitales        | Begoniaceae          | Begonia dierna                           |                       | S        |
|        | Cucurbitales        | Coriariaceae         | Coriaria myrtifolia                      |                       | S        |
| *      | <b>Cucurbitales</b> | <b>Cucurbitaceae</b> | <b>Citrullus lanatus cv. Dixielee</b>    | <b>EU069546</b>       |          |
| *      | <b>Cucurbitales</b> | <b>Cucurbitaceae</b> | <b>Cucumis melo cv. Iroquois</b>         | <b>EU069547</b>       |          |
| *      | <b>Cucurbitales</b> | <b>Cucurbitaceae</b> | <b>Cucumis metuliferus cv. PI 526240</b> | <b>EU069548</b>       |          |
|        | Cucurbitales        | Cucurbitaceae        | Cucumis sativus                          | AJ223416              |          |
|        | <b>Cucurbitales</b> | <b>Cucurbitaceae</b> | <b>Cucurbita pepo</b>                    | <b>short sequence</b> | <b>P</b> |
|        | <b>Cucurbitales</b> | <b>Cucurbitaceae</b> | <b>Luffa acutangula</b>                  | <b>EU156499</b>       | <b>S</b> |
| *      | <b>Cucurbitales</b> | <b>Cucurbitaceae</b> | <b>Melothria indica (IND-PK333)</b>      | <b>EU069549</b>       | <b>P</b> |
|        | Cucurbitales        | Datisceae            | Datisca glomerata                        |                       | S        |
|        | Fabales             | Fabaceae             | Archidendropsis streptocarpa             |                       | P        |
|        | Fabales             | Fabaceae             | Arthroclianthus sp.                      |                       | P        |
|        | Fabales             | Fabaceae             | Astragalus adsurgens                     | ABS20104              |          |
|        | Fabales             | Fabaceae             | Astragalus membranaceus                  | EF685985.1            |          |
|        | Fabales             | Fabaceae             | Astragalus uliginosus                    | ABS20100              |          |
|        | Fabales             | Fabaceae             | Calliandra inaequilatera                 |                       | S        |
|        | Fabales             | Fabaceae             | Cercis canadensis                        |                       | S        |
|        | Fabales             | Fabaceae             | Glycine max                              | M16884                |          |
|        | Fabales             | Fabaceae             | Glycyrrhiza pallidiflora                 | ABS20103              |          |
|        | Fabales             | Fabaceae             | Hedysarum vicioides                      | ABS20102              |          |
|        | Fabales             | Fabaceae             | Medicago lupulina                        |                       | S        |
|        | Fabales             | Fabaceae             | Medicago truncatula                      | AC145156              |          |
|        | Fabales             | Fabaceae             | Oxytropis anertii                        | ABS20101              |          |
|        | Fabales             | Fabaceae             | Pisum sativum                            | X14409                |          |
|        | Fabales             | Fabaceae             | Vigna radiata                            | AF338446              |          |
|        | Fabales             | Polygalaceae         | Polygala lindheimeri                     |                       | S        |
|        | Fagales             | Casuarinaceae        | Casuarina litorea                        |                       | S        |
|        | Fagales             | Betulaceae           | Betula papyrifera                        | U77620                |          |
|        | Fagales             | Betulaceae           | Betula nigra                             |                       | S        |
|        | Fagales             | Fagaceae             | Castanea pumila                          |                       | S        |
|        | Fagales             | Fagaceae             | Chrysolepis sempervirens                 |                       | S        |
|        | Fagales             | Fagaceae             | Quercus alba                             |                       | S        |
|        | Fagales             | Junglandaceae        | Carya glabra                             |                       | S        |
|        | Fagales             | Myricaceae           | Myrica cerifera                          |                       | S        |
|        | Geraniales          | Geraniaceae          | Erodium chrysanthum                      | DQ317038              |          |
|        | Geraniales          | Geraniaceae          | Erodium pelargoniflorum                  | DQ317039              |          |



|                     |                       |                                            |                   |
|---------------------|-----------------------|--------------------------------------------|-------------------|
| Geraniales          | Geraniaceae           | Erodium trifolium                          | DQ317040          |
| Geraniales          | Geraniaceae           | Geranium himalayense                       | AF193968          |
| Geraniales          | Geraniaceae           | Geranium macrorrhizum                      | DQ317035          |
| Geraniales          | Geraniaceae           | Monsonia emarginata                        | DQ317036          |
| Geraniales          | Geraniaceae           | Pelargonium alchemilloides                 | DQ317046          |
| Geraniales          | Geraniaceae           | Pelargonium candicans                      | DQ317043          |
| Geraniales          | Geraniaceae           | Pelargonium capitatum                      | DQ317044          |
| Geraniales          | Geraniaceae           | Pelargonium cotyledonis                    | DQ317041          |
| Geraniales          | Geraniaceae           | Pelargonium quercetorum                    | DQ317045          |
| Geraniales          | Geraniaceae           | Pelargonium reniforme                      | DQ317042          |
| Geraniales          | Geraniaceae           | Pelargonium x hortorum                     | DQ317047          |
| Geraniales          | Geraniaceae           | Sarcocaulon vanderietiae                   | DQ317037          |
| Geraniales          | Hypseocharitaceae     | Hypseocharis pimpinellifolia               | AF193967          |
| Malpighiales        | Balanopaceae          | Balanops oliviformis                       | P                 |
| Malpighiales        | Clusiaceae            | Hypericum sp.                              | S                 |
| * Malpighiales      | <b>Clusiaceae</b>     | <b>Montrouziera cauliflora (IND-PK444)</b> | <b>EU069550 P</b> |
| Malpighiales        | Erythroxylaceae       | Erythroxylum coca                          | S                 |
| * Malpighiales      | Euphorbiaceae         | Acalypha sp. Qiu95079                      | AJ247597          |
| * Malpighiales      | <b>Euphorbiaceae</b>  | <b>Codiaeum peltatum (IND-JM3246)</b>      | <b>EU069551 P</b> |
| * Malpighiales      | Euphorbiaceae         | Croton sp. Qiu 94027                       | AJ247608          |
| * Malpighiales      | Euphorbiaceae         | Euphorbia milii                            | AJ223418          |
| * Malpighiales      | Euphorbiaceae         | Hevea brasiliensis                         | AJ223436          |
| * Malpighiales      | Euphorbiaceae         | Hura crepitans                             | AJ247584          |
| * Malpighiales      | Linaceae              | Linum sp. Qiu96175                         | AJ247604          |
| * Malpighiales      | Malpighiaceae         | Malpighia glabra                           | AJ223433          |
| Malpighiales        | Passifloraceae        | Passiflora suberosa                        | S                 |
| * Malpighiales      | Phyllanthaceae        | Breynia nivosa                             | AJ247605          |
| Malpighiales        | Phyllanthaceae        | Cleistanthus stipitatus                    | P                 |
| * Malpighiales      | <b>Phyllanthaceae</b> | <b>Phyllanthus gneissicus (IND-JM3235)</b> | <b>EU069552 P</b> |
| Malpighiales        | Salicaceae            | Populus tremuloides                        | U77623            |
| Malpighiales        | Salicaceae            | Lasiochlamys cordifolia                    | P                 |
| Malpighiales        | Salicaceae            | Salix sp.                                  | S                 |
| <b>Malpighiales</b> | <b>Trigoniaceae</b>   | <b>Trigonia sp.</b>                        | <b>EU156507</b>   |
| * Malpighiales      | <b>Violaceae</b>      | <b>Hybanthus sp. (IND-JM3091)</b>          | <b>EU069553 P</b> |
| * Malpighiales      | Violaceae             | Viola sp. Qiu95018                         | AJ247600          |
| * Malvales          | Dipterocarpaceae      | Shorea talura                              | AJ247599          |
| Malvales            | Malvaceae             | Abutilon theophrastii                      | S                 |
| Malvales            | Malvaceae             | Quararibea aterolepis                      | S                 |
| Malvales            | Malvaceae             | Theobroma cacao                            | S                 |
| Malvales            | Sterculiaceae         | Acropogon macrocarpus                      | P                 |
| Myrtales            | Lythraceae            | Punica granatum                            | S                 |
| Myrtales            | Melastomataceae       | Melastoma denticulatum                     | P                 |
| Myrtales            | Myrtaceae             | Callistemon lanceolatus                    | S                 |
| Myrtales            | Myrtaceae             | Carpolepis sp.                             | P                 |
| Myrtales            | Myrtaceae             | Eucalyptus cinerea                         | S                 |
| Myrtales            | Myrtaceae             | Eugenia sp.                                | P                 |
| Myrtales            | Myrtaceae             | Eugenia uniflora                           | S                 |
| Myrtales            | Myrtaceae             | Metrosideros brevistylis                   | P                 |
| Myrtales            | Myrtaceae             | Psidium guajava                            | S                 |
| Myrtales            | Myrtaceae             | Stereocaryum sp.                           | P                 |
| Myrtales            | Myrtaceae             | Syzygium aoupinianum                       | P                 |
| Myrtales            | Onagraceae            | Fuchsia sp.                                | S                 |
| Myrtales            | Onagraceae            | Oenothera berteriana                       | X05465            |
| Myrtales            | Onagraceae            | Oenothera biennis                          | AF020571          |
| Myrtales            | Onagraceae            | Oenothera organensis                       | S                 |
| Myrtales            | Vochysiaceae          | Vochysia sp.                               | S                 |
| Oxalidales          | Cephalotaceae         | Cephalotus follicularis                    | AY600111          |

|                      |                   |                      |                                                              |                         |
|----------------------|-------------------|----------------------|--------------------------------------------------------------|-------------------------|
|                      | Oxalidales        | Cunoniaceae          | <i>Acsmithia brongniartiana</i>                              | P                       |
|                      | Oxalidales        | Cunoniaceae          | <i>Cunonia pulchella</i>                                     | P                       |
|                      | Oxalidales        | Cunoniaceae          | <i>Geissois hippocastaneifolia</i>                           | P                       |
|                      | Oxalidales        | Cunoniaceae          | <i>Weinmannia serrata</i>                                    | P                       |
|                      | Oxalidales        | Elaeocarpaceae       | <i>Elaeocarpus dognyensis</i>                                | P                       |
|                      | Oxalidales        | Elaeocarpaceae       | <i>Elaeocarpus angustifolius</i>                             | P                       |
|                      | Oxalidales        | Oxalidaceae          | <i>Oxalis</i> sp.                                            | S                       |
|                      | Rosales           | Cannabaceae          | <i>Humulus lupulus</i>                                       | short sequence S        |
|                      | <b>Rosales</b>    | <b>Elaeagnaceae</b>  | <b><i>Elaeagnus</i> sp.</b>                                  | <b>EU156497</b>         |
|                      | Rosales           | Moraceae             | <i>Ficus habrophylla</i>                                     | P                       |
|                      | Rosales           | Moraceae             | <i>Ficus diversifolia</i>                                    | S                       |
|                      | Rosales           | Moraceae             | <i>Morus alba</i>                                            | S                       |
|                      | Rosales           | Rosaceae             | <i>Malus domestica</i>                                       | S                       |
|                      | Rosales           | Rosaceae             | <i>Prunus serotina</i>                                       | S                       |
| *                    | <b>Rosales</b>    | <b>Rhamnaceae</b>    | <b><i>Bathiorhamnus cryptophorus</i> (Kew Ref. No. 2386)</b> | <b>EU069557</b>         |
|                      | <b>Rosales</b>    | <b>Rhamnaceae</b>    | <b><i>Ceanothus</i> sp.</b>                                  | <b>short sequence P</b> |
|                      | <b>Rosales</b>    | <b>Rhamnaceae</b>    | <b><i>Condalia microphylla</i> (Kew Ref. No. 2383)</b>       | <b>EU069556</b>         |
|                      | <b>Rosales</b>    | <b>Rhamnaceae</b>    | <b><i>Discaria chacaye</i> (Kew Ref. No. 914)</b>            | <b>EU156529</b>         |
| *                    | <b>Rosales</b>    | <b>Rhamnaceae</b>    | <b><i>Frangula alnus</i> (Kew Ref. No. 1815)</b>             | <b>EU156521</b>         |
| *                    | Rosales           | Rhamnaceae           | <i>Hovenia dulcis</i>                                        | AJ247583                |
|                      | <b>Rosales</b>    | <b>Rhamnaceae</b>    | <b><i>Karwinskia kumboldtiana</i> (Kew Ref. No. 2382)</b>    | <b>EU156522</b>         |
| *                    | <b>Rosales</b>    | <b>Rhamnaceae</b>    | <b><i>Maesopsis eminii</i> (Kew Ref. No. 1338)</b>           | <b>EU069554</b>         |
| *                    | <b>Rosales</b>    | <b>Rhamnaceae</b>    | <b><i>Nesiotia elliptica</i> (Kew Ref. No. 500)</b>          | <b>EU156528</b>         |
| *                    | <b>Rosales</b>    | <b>Rhamnaceae</b>    | <b><i>Paliurus spina-christi</i> (Kew Ref. No. 969)</b>      | <b>EU156525</b>         |
| *                    | <b>Rosales</b>    | <b>Rhamnaceae</b>    | <b><i>Phylica emirnenensis</i> (Kew Ref. No. 19156)</b>      | <b>EU069555</b>         |
| *                    | <b>Rosales</b>    | <b>Rhamnaceae</b>    | <b><i>Rhamnella franguloides</i> (Kew Ref. No. 912)</b>      | <b>EU156523</b>         |
| *                    | <b>Rosales</b>    | <b>Rhamnaceae</b>    | <b><i>Rhamnus alpina</i> (Kew Ref. No. 8482)</b>             | <b>short sequence P</b> |
| *                    | Rosales           | Rhamnaceae           | <i>Rhamnus cathartica</i>                                    | AJ223422                |
|                      | <b>Rosales</b>    | <b>Rhamnaceae</b>    | <b><i>Trymalium cf. floribundum</i> (Kew Ref. No. 2185)</b>  | <b>EU156527</b>         |
|                      | <b>Rosales</b>    | <b>Rhamnaceae</b>    | <b><i>Ventilago leiocarpa</i> (Kew Ref. No. 2575)</b>        | <b>EU156524</b>         |
| *                    | <b>Rosales</b>    | <b>Rhamnaceae</b>    | <b><i>Ziziphus ornata</i> (Kew Ref. No. 2117)</b>            | <b>EU156526</b>         |
|                      | Rosales           | Ulmaceae             | <i>Celtis yunnanensis</i>                                    | S                       |
|                      | Rosales           | Ulmaceae             | <i>Ulmus thomsii</i>                                         | S                       |
|                      | Rosales           | Urticaceae           | <i>Boehmeria nivea</i>                                       | short sequence S        |
| *                    | Rosales           | Urticaceae           | <i>Pilea fontana</i>                                         | AJ247580                |
|                      | <b>Sapindales</b> | <b>Anacardiaceae</b> | <b><i>Rhus radicans</i></b>                                  | <b>EU156505 S</b>       |
| *                    | Sapindales        | Burseraceae          | <i>Bursera</i> sp. Qiu 94206                                 | AJ223412                |
|                      | Sapindales        | Burseraceae          | <i>Canarium cf. trifoliolatum</i>                            | P                       |
| *                    | <b>Sapindales</b> | <b>Meliaceae</b>     | <b><i>Dysoxylum canalense</i> (IND-10003)</b>                | <b>EU069558 P</b>       |
| *                    | Sapindales        | Meliaceae            | <i>Melia toosendan</i>                                       | AJ223420                |
|                      | Sapindales        | Rutaceae             | <i>Citrus limon</i>                                          | S                       |
|                      | Sapindales        | Rutaceae             | <i>Picrella glandulosa</i>                                   | P                       |
|                      | Sapindales        | Rutaceae             | <i>Triphasia trifolia</i>                                    | S                       |
|                      | Sapindales        | Rutaceae             | <i>Zanthoxylum</i> sp.                                       | P                       |
|                      | <b>Sapindales</b> | <b>Sapindaceae</b>   | <b><i>Acer saccharum</i></b>                                 | <b>EU156500 S</b>       |
|                      | Sapindales        | Sapindaceae          | <i>Aesculus pavia</i>                                        | S                       |
|                      | Sapindales        | Sapindaceae          | <i>Cupaniopsis macrocarpa</i>                                | P                       |
|                      | Sapindales        | Sapindaceae          | <i>Cupaniopsis oedipoda</i>                                  | P                       |
|                      | Sapindales        | Sapindaceae          | <i>Gongrodiscus sufferrugineus</i>                           | P                       |
|                      | Sapindales        | Sapindaceae          | <i>Podonophelium</i> sp.                                     | P                       |
|                      | Sapindales        | Sapindaceae          | <i>Storthocalyx</i> sp.                                      | P                       |
| *                    | <b>Sapindales</b> | <b>Simaroubaceae</b> | <b><i>Leitneria floridana</i></b>                            | <b>EU156504 S</b>       |
| <b>Stem Eudicots</b> |                   |                      |                                                              |                         |
|                      | Buxales           | Buxaceae             | <i>Buxus</i> sp. Qiu 94069                                   | AF193962                |
|                      | Buxales           | Buxaceae             | <i>Pachysandra procumbens</i>                                | S                       |
|                      | Dilleniales       | Dilleniaceae         | <i>Tetracera billardieri</i>                                 | P                       |
|                      | Proteales         | Nelumbonaceae        | <i>Nelumbo lutea</i>                                         | AY009447                |

|            |                 |                   |                                   |          |   |
|------------|-----------------|-------------------|-----------------------------------|----------|---|
|            | Proteales       | Nelumbonaceae     | Nelumbo nucifera                  | AF193950 |   |
|            | Proteales       | Platanaceae       | Platanus occidentalis             | AY009450 |   |
|            | Proteales       | Proteaceae        | Beauprea filipes                  |          | P |
|            | Proteales       | Proteaceae        | Grevillea robusta                 | AY009449 |   |
|            | Proteales       | Proteaceae        | Sleumerodendron austrocaledonicum |          | P |
|            | Ranunculales    | Berberidaceae     | Mahonia bealei                    |          | S |
|            | Ranunculales    | Berberidaceae     | Podophyllum peltatum              |          | S |
|            | Ranunculales    | Eupteleaceae      | Euptelea polyandra                | AF193963 |   |
|            | Ranunculales    | Fumariaceae       | Dicentra sp.                      |          | S |
|            | Ranunculales    | Fumariaceae       | Pseudofumaria lutea               | AY009441 |   |
|            | Ranunculales    | Lardizabalaceae   | Akebia quinata                    | AY009429 |   |
|            | Ranunculales    | Menispermaceae    | Cissampelos parrira               |          | S |
|            | Ranunculales    | Menispermaceae    | Cocculus trilobus                 |          | S |
|            | Ranunculales    | Menispermaceae    | Hypserpa neocaledonica            |          | P |
|            | Ranunculales    | Papaveraceae      | Bocconia frutescens               |          | S |
|            | Ranunculales    | Papaveraceae      | Sanguinaria canadensis            |          | S |
|            | Ranunculales    | Ranunculaceae     | Clematis sp. Qiu 95085            | AF193960 |   |
|            | Ranunculales    | Ranunculaceae     | Ranunculus carolinianus           | AY009451 |   |
|            | Ranunculales    | Ranunculaceae     | Ranunculus sp. Qiu 95024          | DQ317030 |   |
|            | Ranunculales    | Ranunculaceae     | Xanthorhiza simplicissima         |          | S |
| *          | Santalales      | Opiliaceae        | Lepionurus sylvestris             | AJ223439 |   |
|            | Saxifragales    | Cercidiphyllaceae | Cercidiphyllum japonicum          |          | S |
|            | Saxifragales    | Daphniphyllaceae  | Daphniphyllum sp.                 |          | S |
|            | Saxifragales    | Grossulariaceae   | Ribes sp.                         |          | S |
|            | Saxifragales    | Haloragaceae      | Myriophyllum sp.                  |          | S |
|            | Saxifragales    | Hamamelidaceae    | Corylopsis gotoana                |          | S |
|            | Saxifragales    | Hamamelidaceae    | Distylium racemosus               |          | S |
|            | Saxifragales    | Hamamelidaceae    | Hamamelis mollis                  |          | S |
|            | Saxifragales    | Hamamelidaceae    | Liquidambar styraciflua           |          | S |
|            | Saxifragales    | Hamamelidaceae    | Loropetalum chinense              |          | S |
|            | Saxifragales    | Hamamelidaceae    | Mytilaria laeensis                |          | S |
|            | Saxifragales    | Iteaceae          | Itea virginica                    |          | S |
|            | Saxifragales    | Paeoniaceae       | Paeonia lactiflora                |          | S |
|            | Saxifragales    | Saxifragaceae     | Heuchera sp.                      |          | S |
|            | Saxifragales    | Saxifragaceae     | Saxifraga sarmentosa              |          | S |
|            | Trochodendrales | Tetracentraceae   | Tetracentron sinense              | AY009455 |   |
|            | Trochodendrales | Trochodendraceae  | Trochodendron aralioides          | AF020581 |   |
|            | Unplaced        | Sabiaceae         | Sabia sp.                         |          | S |
|            | Vitales         | Vitaceae          | Vitis sp.                         |          | S |
| <hr/>      |                 |                   |                                   |          |   |
| Magnoliids |                 |                   |                                   |          |   |
|            | Canellales      | Canellaceae       | Canella winterana                 | AY009437 |   |
|            | Canellales      | Winteraceae       | Belliolum pauciflora              |          | S |
|            | Canellales      | Winteraceae       | Drimys winteri                    | AY009443 |   |
|            | Canellales      | Winteraceae       | Zygogynum stipitatum              |          | P |
|            | Laurales        | Calycanthaceae    | Calycanthus floridus              | AY009436 |   |
|            | Laurales        | Calycanthaceae    | Idiospermum australiense          |          | S |
|            | Laurales        | Hernandiaceae     | Gyrocarpus sp.                    |          | S |
|            | Laurales        | Lauraceae         | Cinnamomum verum                  | AY009440 |   |
|            | Laurales        | Lauraceae         | Cinnamomum camphora               |          | S |
|            | Laurales        | Lauraceae         | Endiandra sp.                     |          | P |
|            | Laurales        | Lauraceae         | Laurus nobilis                    | AF193956 |   |
|            | Laurales        | Monimiaceae       | Hedycarya sp                      |          | P |
|            | Laurales        | Monimiaceae       | Hedycarya arborea                 |          | S |
|            | Magnoliales     | Annonaceae        | Annona muricata                   |          | S |
| *          | Magnoliales     | Annonaceae        | Asimina triloba                   | AY009433 |   |
|            | Magnoliales     | Annonaceae        | Cananga odorata                   |          | S |
|            | Magnoliales     | Annonaceae        | Polyalthia suberosa               | AF193957 |   |

|                      |               |                  |                             |                |   |
|----------------------|---------------|------------------|-----------------------------|----------------|---|
|                      | Magnoliales   | Degeneriaceae    | Degeneria sp                |                | S |
|                      | Magnoliales   | Eupomatiaceae    | Eupomatia bennetti          |                | S |
|                      | Magnoliales   | Eupomatiaceae    | Eupomatia laurina           | AY009444       |   |
|                      | Magnoliales   | Himantandraceae  | Galbulimima belgraveana     |                | S |
|                      | Magnoliales   | Magnoliaceae     | Liriodendron tulipifera     | AF193959       |   |
|                      | Magnoliales   | Magnoliaceae     | Magnolia grandiflora        | AF020568       |   |
|                      | Magnoliales   | Magnoliaceae     | Magnolia stellata           | U77622         |   |
|                      | Magnoliales   | Magnoliaceae     | Magnolia tripetala          |                | S |
|                      | Magnoliales   | Magnoliaceae     | Talauma singaporensis       |                | S |
| *                    | Magnoliales   | Myristicaceae    | Knema latericia             | AJ223430       |   |
| *                    | Magnoliales   | Myristicaceae    | Myristica fragrans          | AJ223434       |   |
|                      | Piperales     | Aristolochiaceae | Asarum canadense            | AY009432       |   |
|                      | Piperales     | Aristolochiaceae | Saruma henryi               |                | S |
|                      | Piperales     | Lactoridaceae    | Lactoris fernandeziana      | AY009446       |   |
| *                    | Piperales     | Piperaceae       | Peperomia cubensis          | AF029783       |   |
| *                    | Piperales     | Piperaceae       | Peperomia griseoargentea    | AF029781       |   |
| *                    | Piperales     | Piperaceae       | Peperomia obtusifolia       | AF029782       |   |
| *                    | Piperales     | Piperaceae       | Peperomia polybotrya        | X94594         |   |
|                      | Piperales     | Piperaceae       | Piper bicolor               | AY009448       |   |
|                      | Piperales     | Piperaceae       | Piper betle                 |                | S |
|                      | Piperales     | Piperaceae       | Piper comptonii             |                | P |
|                      | Piperales     | Saururaceae      | Saururus chinensis          | AY009452       |   |
| <b>Chloranthales</b> |               |                  |                             |                |   |
|                      | Chloranthales | Chloranthaceae   | Ascarina solmsiana          |                | P |
|                      | Chloranthales | Chloranthaceae   | Chloranthus spicatus        | AY009439       |   |
|                      | Chloranthales | Chloranthaceae   | Sarcandra grandifolia       | AF193958       |   |
| <b>Monocots</b>      |               |                  |                             |                |   |
|                      | Acorales      | Acoraceae        | Acorus calamus              | AF193944       |   |
|                      | Alismatales   | Alismataceae     | Echinodorus radicans        |                | S |
| *                    | Alismatales   | Araceae          | Amorphophallus konjac       | AJ007548       |   |
|                      | Alismatales   | Araceae          | Anthurium scherzerianum     | AJ007551       |   |
| *                    | Alismatales   | Araceae          | Arisaema triphyllum         | AY009454       |   |
|                      | Alismatales   | Araceae          | Dieffenbachia sp. Qiu 96007 | AJ007549       |   |
|                      | Alismatales   | Araceae          | Lemna gibba                 | Cho et al 1999 |   |
|                      | Alismatales   | Araceae          | Orontium aquaticum          | AJ007554       |   |
|                      | Alismatales   | Araceae          | Peltandra virginica         | AJ007550       |   |
| *                    | Alismatales   | Araceae          | Philodendron oxycardium     | AJ223438       |   |
| *                    | Alismatales   | Araceae          | Pistia stratiotes           | AJ007546       |   |
|                      | Alismatales   | Araceae          | Scindapsus aureus           | AJ007552       |   |
|                      | Alismatales   | Araceae          | Spathiphyllum clevelandii   |                | S |
|                      | Alismatales   | Araceae          | Spathiphyllum wallisii      | AJ007554       |   |
| *                    | Alismatales   | Araceae          | Xanthosoma mafaffa          | AJ223807       |   |
| *                    | Alismatales   | Araceae          | Zamioculcas zamiifolia      | AJ007547       |   |
|                      | Alismatales   | Araceae          | Zantedeschia aethiopica     | AJ007555       |   |
|                      | Alismatales   | Hydrocharitaceae | Anacharis sp                |                | S |
|                      | Alismatales   | Hydrocharitaceae | Vallisneria americana       |                | S |
|                      | Arecales      | Arecaceae        | Chamaedorea tenella         |                | S |
|                      | Arecales      | Arecaceae        | Chamaerops humilis          | U77621         |   |
|                      | Arecales      | Arecaceae        | Cocos nucifera              |                | S |
|                      | Arecales      | Arecaceae        | Phoenix dactylifera         | AY166800       |   |
|                      | Arecales      | Arecaceae        | Raphis sp.                  |                | S |
|                      | Arecales      | Arecaceae        | Sabal palmetto              | U77624         |   |
|                      | Asparagales   | Agavaceae        | Agave attenuata             |                | S |
|                      | Asparagales   | Agavaceae        | Cordyline terminalis        |                | S |
|                      | Asparagales   | Alliaceae        | Allium cepa                 |                | S |
|                      | Asparagales   | Alliaceae        | Allium sativum              | AF356823       |   |
|                      | Asparagales   | Amaryllidaceae   | Clivia miniata              |                | S |

|              |                   |                                       |          |
|--------------|-------------------|---------------------------------------|----------|
| Asparagales  | Amaryllidaceae    | Crinum asiaticum                      | P        |
| Asparagales  | Amaryllidaceae    | Sprekelia formosissima                | S        |
| Asparagales  | Asparagaceae      | Asparagus officinalis                 | S        |
| Asparagales  | Hemerocallidaceae | Eustrephus latifolius                 | P        |
| Asparagales  | Hemerocallidaceae | Hemerocallis sp.                      | S        |
| Asparagales  | Hyacinthaceae     | Hosta sp.                             | S        |
| Asparagales  | Iridaceae         | Belamcanda chinensis                  | S        |
| Asparagales  | Iridaceae         | Iris sp.                              | S        |
| Asparagales  | Orchidaceae       | Bulbophyllum aff. Baladeanum          | P        |
| Asparagales  | Orchidaceae       | Calanthe sp.                          | P        |
| Asparagales  | Orchidaceae       | Ceratostylis micrantha                | P        |
| Asparagales  | Orchidaceae       | Dendrobium cf. muricatum              | P        |
| Asparagales  | Orchidaceae       | Glomera macdonaldii                   | P        |
| Asparagales  | Orchidaceae       | Grastidium camaridiorum               | P        |
| Asparagales  | Orchidaceae       | Liparis condylobulbon                 | P        |
| Asparagales  | Orchidaceae       | Oberonia ensiformis                   | P        |
| Asparagales  | Orchidaceae       | Oncidium sphacelatum                  | S        |
| Asparagales  | Orchidaceae       | Phalaenopsis sp.                      | S        |
| Asparagales  | Ruscaceae         | Danae racemosa                        | S        |
| Asparagales  | Ruscaceae         | Dracaena godseffiana                  | S        |
| Asparagales  | Ruscaceae         | Polygonatum sp.                       | S        |
| Asparagales  | Ruscaceae         | Ruscus hypoglossum                    | S        |
| Commelinales | Commelinaceae     | Tradescantia sp.                      | S        |
| Commelinales | Haemodoraceae     | Anigozanthos sp.                      | S        |
| Commelinales | Pontederiaceae    | Eichhornia crassipes                  | S        |
| Dioscoreales | Dioscoreaceae     | Dioscorea mexicana                    | AY009442 |
| Liliales     | Melanthiaceae     | Trillium sp.                          | S        |
| Liliales     | Smilacaceae       | Smilax purpurata                      | P        |
| Pandanales   | Pandanaceae       | Freycinetia monticola                 | P        |
| Pandanales   | Pandanaceae       | Pandanus veitchii                     | S        |
| Pandanales   | Pandanaceae       | Pandanus sp.                          | P        |
| Poales       | Bromeliaceae      | Guzmania lingulata                    | S        |
| Poales       | Cyperaceae        | Cyperus alternifolia                  | S        |
| Poales       | Flagellariaceae   | Flagellaria indica                    | P        |
| Poales       | Joinvilleaceae    | Joinvillea ascendens subsp. ascendens | P        |
| Poales       | Joinvilleaceae    | Joinvillea plicata                    | P        |
| Poales       | Juncaceae         | Juncus sp.                            | S        |
| Poales       | Poaceae           | Aegilops columnaris                   | U46764   |
| Poales       | Poaceae           | Avena sativa                          | P        |
| Poales       | Poaceae           | Bromus inermis                        | P        |
| Poales       | Poaceae           | Chionochloa flavescens                | P        |
| Poales       | Poaceae           | Coix lacryma-jobi                     | DQ646384 |
| Poales       | Poaceae           | Cortaderia nitida                     | P        |
| Poales       | Poaceae           | Cortaderia richardii                  | P        |
| Poales       | Poaceae           | Cortaderia seloana                    | P        |
| Poales       | Poaceae           | Cortaderia splendens                  | P        |
| Poales       | Poaceae           | Danthonia spicata                     | P        |
| Poales       | Poaceae           | Dendrocalamus strictus                | S        |
| Poales       | Poaceae           | Elymus sibiricus                      | AJ296026 |
| Poales       | Poaceae           | Eragrostis curvula                    | P        |
| Poales       | Poaceae           | Festuca ovina                         | P        |
| Poales       | Poaceae           | Glyceria striata                      | P        |
| Poales       | Poaceae           | Hordeum vulgare                       | S        |
| Poales       | Poaceae           | Karoochloa purpurea                   | P        |
| Poales       | Poaceae           | Lamprothyrsus peruvianus              | P        |
| Poales       | Poaceae           | Litachne pauciflora                   | P        |
| Poales       | Poaceae           | Mersmuellera papposa                  | P        |

|   |              |                       |                                                  |                 |   |
|---|--------------|-----------------------|--------------------------------------------------|-----------------|---|
|   | Poales       | Poaceae               | Merxmullera decora                               |                 | P |
|   | Poales       | Poaceae               | Notochloe microdon                               |                 | P |
|   | Poales       | Poaceae               | Oryza sativa                                     | BA000029        |   |
|   | Poales       | Poaceae               | Pariana radiculiflora                            |                 | P |
|   | Poales       | Poaceae               | Pennisetum alopecuroides                         |                 | P |
|   | Poales       | Poaceae               | Pentameris macrocalycina                         |                 | P |
|   | Poales       | Poaceae               | Pentaschistis aspera                             |                 | P |
|   | Poales       | Poaceae               | Phragmites australis                             |                 | P |
|   | Poales       | Poaceae               | Plinthanthesis paradoxa                          |                 | P |
|   | Poales       | Poaceae               | Secale cereale                                   | AM050161        |   |
|   | Poales       | Poaceae               | Setaria poiretiana                               |                 | P |
|   | Poales       | Poaceae               | Sorghum bicolor                                  | M14453          |   |
|   | Poales       | Poaceae               | Thysanolaena maxima                              |                 | P |
|   | Poales       | Poaceae               | Triticum aestivum                                | AP008982        |   |
|   | Poales       | Poaceae               | Zea mays                                         | AY506529        |   |
|   | Poales       | Typhaceae             | Typha sp.                                        |                 | S |
|   | Poales       | Restionaceae          | Chondropetalum tectorum                          |                 | P |
|   | Poales       | Restionaceae          | Elegia repens                                    |                 | P |
|   | Zingiberales | Cannaceae             | Canna paniculata                                 | AY673037        |   |
|   | Zingiberales | Costaceae             | Costus pulverulentus                             | AY673038        |   |
|   | Zingiberales | Costaceae             | Costus speciosus                                 |                 | S |
|   | Zingiberales | Heliconiaceae         | Heliconia irrasa                                 | AY673039        |   |
|   | Zingiberales | Lowiaceae             | Orchidantha fimbriata                            | AY673041        |   |
|   | Zingiberales | Marantaceae           | Ataenidia conferta                               | AY673012        |   |
|   | Zingiberales | Marantaceae           | Calathea metallica                               | AY673014        |   |
|   | Zingiberales | Marantaceae           | Calathea micans                                  | AY673015        |   |
|   | Zingiberales | Marantaceae           | Calathea rufibarba                               | AY673016        |   |
|   | Zingiberales | Marantaceae           | Calathea warszewiczii                            | AY673017        |   |
|   | Zingiberales | Marantaceae           | Cominsia gigantea                                | AY673018        |   |
| * | Zingiberales | Marantaceae           | Ctenanthe setosa                                 | AY673019        |   |
|   | Zingiberales | Marantaceae           | Donax canniformis                                | AY673020        |   |
|   | Zingiberales | Marantaceae           | Haumania sp. Harris 6672                         | AY673021        |   |
|   | Zingiberales | Marantaceae           | Hypselodelphys sp. Harris 6670                   | AY673022        |   |
|   | Zingiberales | Marantaceae           | Ischnosiphon helenae                             | AY673023        |   |
| * | Zingiberales | Marantaceae           | Maranta bicolor                                  | AY673024        |   |
| * | Zingiberales | Marantaceae           | Maranta leuconeura                               | AJ223432        |   |
|   | Zingiberales | Marantaceae           | Marantochloa purpurea                            | AY673025        |   |
| * | Zingiberales | Marantaceae           | Monotagma laxum                                  | AY673026        |   |
|   | Zingiberales | Marantaceae           | Phrynium imbricatum                              | AY673027        |   |
|   | Zingiberales | Marantaceae           | Pleiostachya pruinosa                            | AY673029        |   |
| * | Zingiberales | Marantaceae           | Saranthe sp. Kress 96-5737                       | AY673030        |   |
| * | Zingiberales | <b>Marantaceae</b>    | <b>Saranthe leptostachya (Kew Ref. No. 3866)</b> | <b>EU069559</b> |   |
|   | Zingiberales | Marantaceae           | Sarcophrynium brachystachys                      | AY673031        |   |
|   | Zingiberales | Marantaceae           | Schumannianthus dichotomus                       | AY673032        |   |
|   | Zingiberales | Marantaceae           | Schumannianthus virgatus                         | AY673033        |   |
|   | Zingiberales | Marantaceae           | Stachyphrynium repens                            | AY673028        |   |
|   | Zingiberales | Marantaceae           | Thalia geniculata                                | AY673034        |   |
|   | Zingiberales | Marantaceae           | Thaumatococcus daniellii                         | AY673035        |   |
|   | Zingiberales | Marantaceae           | Trachyphrynium braunianum                        | AY673036        |   |
| * | Zingiberales | Musaceae              | Musa acuminata                                   | AJ247609        |   |
| * | Zingiberales | Musaceae              | Musella lasiocarpa                               | AY673040        |   |
|   | Zingiberales | Strelitziaceae        | Phenakospermum guyanense                         | AY673042        |   |
|   | Zingiberales | <b>Strelitziaceae</b> | <b>Strelitzia reginae</b>                        | <b>EU069571</b> | S |
|   | Zingiberales | <b>Zingiberaceae</b>  | <b>Aframomum angustifolium</b>                   | <b>EU069560</b> |   |
| * | Zingiberales | <b>Zingiberaceae</b>  | <b>Boesenbergia rotunda</b>                      | <b>EU069561</b> |   |
|   | Zingiberales | <b>Zingiberaceae</b>  | <b>Burbridgea nitida</b>                         | <b>EU069562</b> |   |
|   | Zingiberales | <b>Zingiberaceae</b>  | <b>Curcuma longa</b>                             | <b>EU069563</b> |   |

|                         |                     |                      |                                |                 |
|-------------------------|---------------------|----------------------|--------------------------------|-----------------|
| *                       | <b>Zingiberales</b> | <b>Zingiberaceae</b> | <b>Gagnepainia godefroyi</b>   | <b>EU069564</b> |
| *                       | <b>Zingiberales</b> | <b>Zingiberaceae</b> | <b>Globba sessiliflora</b>     | <b>EU069565</b> |
| *                       | Zingiberales        | Zingiberaceae        | Hedychium coronarium           | AJ223426        |
| *                       | <b>Zingiberales</b> | <b>Zingiberaceae</b> | <b>Kaempferia rotunda</b>      | <b>EU069566</b> |
|                         | <b>Zingiberales</b> | <b>Zingiberaceae</b> | <b>Plagiostachys sp.</b>       | <b>EU069567</b> |
|                         | <b>Zingiberales</b> | <b>Zingiberaceae</b> | <b>Reidelia sp.</b>            | <b>EU069568</b> |
| *                       | Zingiberales        | Zingiberaceae        | Siphonochilus decorus          | AY673043        |
|                         | <b>Zingiberales</b> | <b>Zingiberaceae</b> | <b>Smithatris myanmarensis</b> | <b>EU069569</b> |
|                         | <b>Zingiberales</b> | <b>Zingiberaceae</b> | <b>Tamijia sp.</b>             | <b>EU069570</b> |
| <b>Ceratophyllales</b>  |                     |                      |                                |                 |
|                         | Ceratophyllales     | Ceratophyllaceae     | Ceratophyllum demersum         | AY009438        |
| <b>Stem Angiosperms</b> |                     |                      |                                |                 |
|                         | Amborellales        | Amborellaceae        | Amborella trichopoda           | AY009430        |
|                         | Austrobaileyales    | Austrobaileyaceae    | Austrobaileya scandens         | AY009434        |
|                         | Austrobaileyales    | Schisandraceae       | Illicium lanceolatum           | AY009445        |
|                         | Austrobaileyales    | Schisandraceae       | Kadsura japonica               | AF193952        |
|                         | Austrobaileyales    | Schisandraceae       | Schisandra henryi              | AY009453        |
|                         | Austrobaileyales    | Schisandraceae       | Schisandra sphenanthera        | AF193951        |
|                         | Austrobaileyales    | Trimeniaceae         | Trimenia sp. CCWD-2000         | AY009456        |
|                         | Nymphaeales         | Cabombaceae          | Brasenia schreberi             | S               |
|                         | Nymphaeales         | Cabombaceae          | Cabomba caroliniana            | AY009435        |
|                         | Nymphaeales         | Cabombaceae          | Cabomba sp. Palmer 688         | AF193949        |
|                         | Nymphaeales         | Nymphaeaceae         | Euryale sp. Palmer 790         | AF193947        |
|                         | Nymphaeales         | Nymphaeaceae         | Nuphar sp. Palmer 689          | AF193948        |
|                         | Nymphaeales         | Nymphaeaceae         | Nymphaea odorata               | AF020570        |
|                         | Nymphaeales         | Nymphaeaceae         | Victoria cf. amazonica         | AF193946        |

a- GenBank accession numbers are given for those taxa for which cox1 sequences are available. New sequences are shown in bold.

P- indicates that cox1 intron presence/absence data come from PCR survey (this study)

S indicates that cox1 intron presence/absence data come from Southern blots (Cho et al 1998)

\* Asterisks indicate cox1 intron presence.

Figure S1

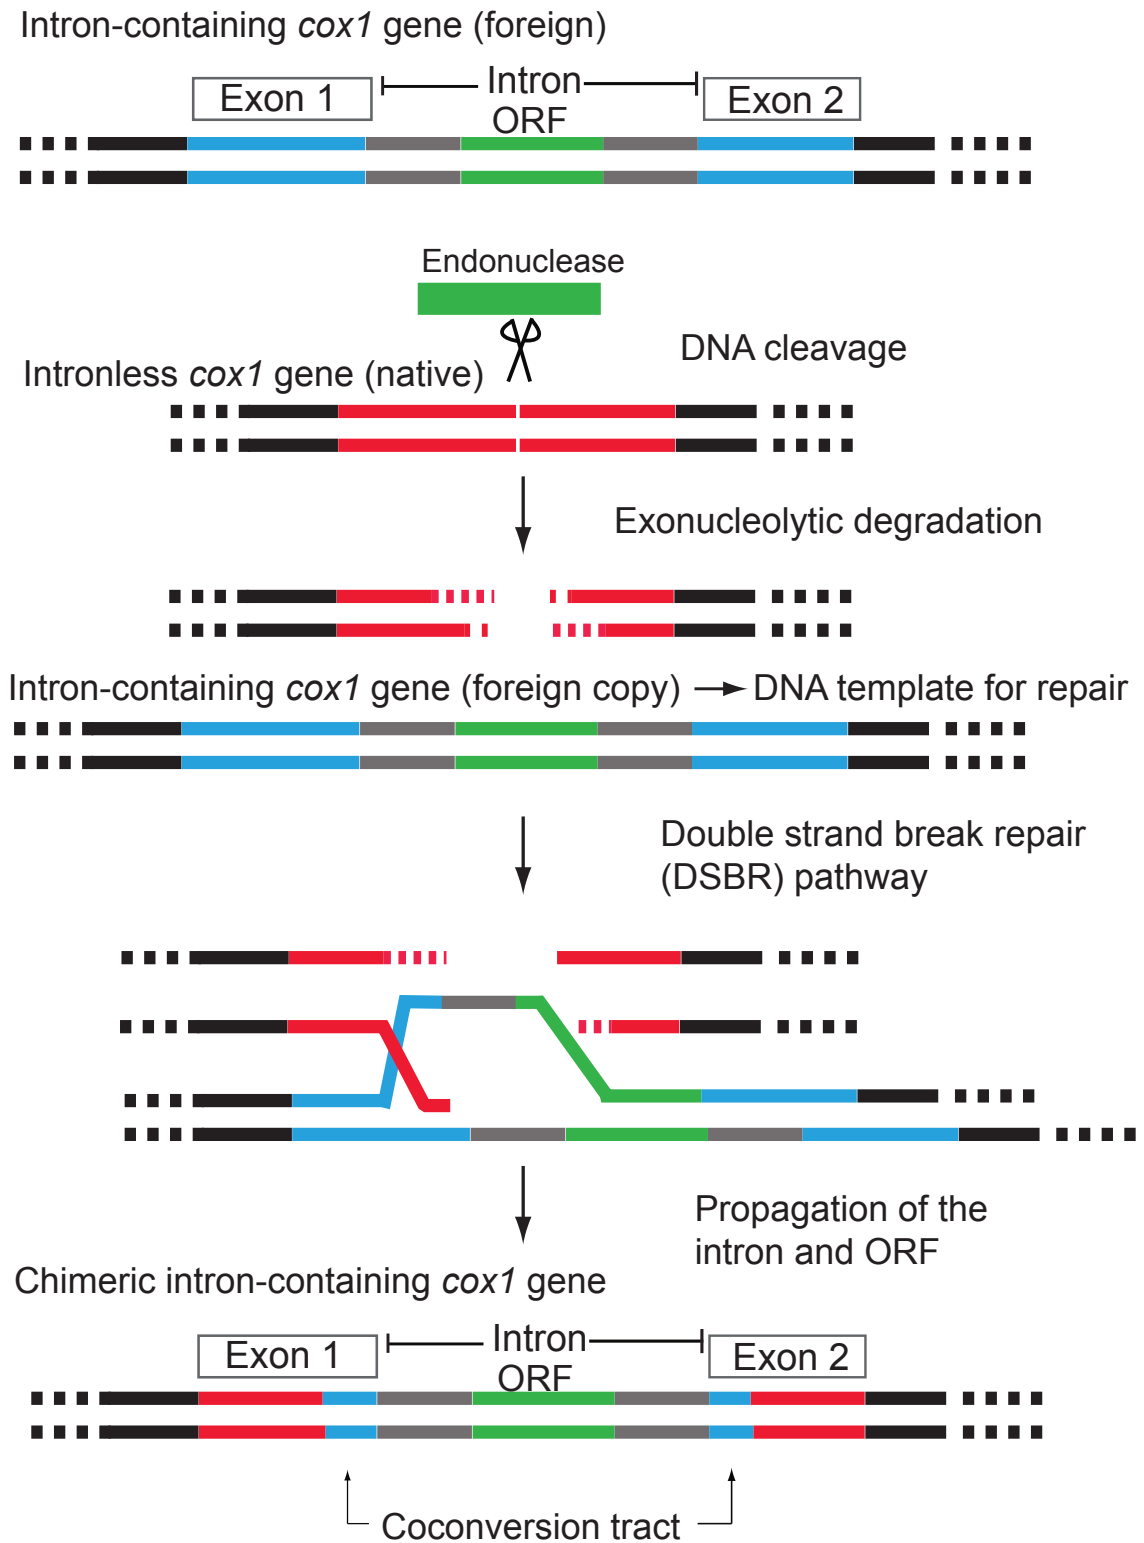



Figure S2

|                                    | COX1 EXON 1                                 | INTRON  | INSERTION SITE | COX1 EXON 2                              |
|------------------------------------|---------------------------------------------|---------|----------------|------------------------------------------|
| NYMPnymp Nuphar_sp_Palmer_689      | GGAGACCCCA TATTATACCA GCATCTCTTT CGGTTCTTCC | GT----- | CATCCAGAGG     | TGTATATTC CATTCCGCCT GGATTCGGTA TCATAAGT |
| AMBoambo Amborella trichopoda      | .....T.....C.....                           |         |                | .....T.....C.....                        |
| NYMPcabo Cabomba_caroliniana_M     | ..G...T.....                                |         |                | .....T.....                              |
| NYMPcabo Cabomba_sp                | .....G.....                                 |         |                | .....T...C.....                          |
| NYMPcabo Cabomba_sp_Palmer_68      | ..G...T.T.....                              |         |                | .....T.....                              |
| NYMPnymp Euryale_sp_Palmer_79      | .....T.....                                 |         |                | .....T.....                              |
| NYMPnymp Nymphaea odorata          | .....T.....                                 |         |                | .....T.....                              |
| NYMPnymp Victoria_cf_amazonic      | .....T.....                                 |         |                | .....T.....                              |
| AUSTaust Austrobaileya             | .....T.....                                 |         |                | .....T.....                              |
| AUSTschi Illicium lanceolatum      | .....T.....                                 |         |                | .....C.....                              |
| AUSTschi Kadsura japonica          | .....T.....                                 |         |                | .....A...C.....                          |
| AUSTschi Schisandra henryi         | .....T.....                                 |         |                | .....A...C.....                          |
| AUSTschi Schisandra sphenanthe     | .....T.....                                 |         |                | .....A...C.....                          |
| AUSTtrim Trimenia_sp.              | .....T.....                                 |         |                | .....C.....                              |
| CERAcera Ceratophyllum             | .....T.....                                 |         |                | .....T.....                              |
| CHLOchlo Chloranthus spicatus      | .....G.....                                 |         |                | .....C.....                              |
| CHLOchlo Sarcandra grandifolia     | .....A...G.....                             |         |                | .....C.....                              |
| CANcane Canella winterana          | .....T.....                                 |         |                | .....C...T...T.....                      |
| CANewint Drimys winteri            | .....T.....                                 |         |                | .....T.....C.....                        |
| PIPEaris Asarum canadense          | .....T.....                                 |         |                | .....T.....                              |
| PIPElact Lactoris                  | .....T.....                                 |         |                | .....T.....C.....                        |
| PIPEpipe Piper bicolor             | .....A.....                                 |         |                | .....T...CT.....                         |
| PIPEpipe Peperomia cubensis        | .....A.....                                 |         |                | .....C.T.A.....T...CT.....               |
| PIPEsaur Saururus chinensis        | .....A.....                                 |         |                | .....T.....C.....                        |
| LAURcaly Calycanthus floridus      | .....T.....                                 |         |                | .....T.....                              |
| LAURLaur Cinnamomum                | .....T.....                                 |         |                | .....C.....                              |
| LAURLaur Laurus nobilis            | .....T.....                                 |         |                | .....C.....                              |
| MAGNmagn Liriodendron              | .....T.....                                 |         |                | .....T.....C.....                        |
| MAGNmagn Magnolia grandiflora      | .....T.....                                 |         |                | .....T.....C.....                        |
| MAGNmagn Magnolia stellata         | .....T.....                                 |         |                | .....T.....C.....                        |
| MAGNMyri Asimina triloba           | .....C.T.A.....T.C.C.C.T.....               |         |                | .....T.....C.....                        |
| MGNMyris Knema latericia           | .....C.T.A.....T.C.C.C.T.....               |         |                | .....T.....C.....                        |
| MAGNMyris Myristica fragrans       | .....C.T.A.....T.C.C.C.T.....               |         |                | .....T.....C.....                        |
| MAGNanno Polyalthia suberosa       | .....C.T.A.....T.....                       |         |                | .....T.....C.....                        |
| MAGNeupo Eupomatia laurina         | .....C.....                                 |         |                | .....T.....C.....                        |
| ACORacor Acorus calamus            | .....A...C.....A...T...T.....               |         |                | .....C...T...T.....T.....                |
| ALISalis Alisma                    | .....T.....                                 |         |                | .....T...T.....T.T.T.....                |
| ALISarac Anthurium                 | .....T.....                                 |         |                | .....T...C.....T.T.T.....                |
| ALISarac Dieffenbachia             | .....T.....                                 |         |                | .....T...T.....T.T.T.....                |
| ALISarac Zantedeschia aethiopica   | .....AT...TA.....                           |         |                | .....T.....A...T.T.T.....                |
| ALISarac Amorphophallus rivieri    | .....C.T.A.....T.C.C.C.T.....               |         |                | .....T.....T.T.T.....                    |
| ALISarac Xanthosoma mafaffa        | .....C.....A.....                           |         |                | .....T.....T.T.T.....                    |
| ALISarac Philodendron oxycardium   | .....T.....C.T.A.....                       |         |                | .....T.....T.T.T.....                    |
| ALISarac Arisaema triphyllum       | .....C.T.A.....T.C.C.C.T.....               |         |                | .....T.....T.T.T.....                    |
| ALISarac Zamioculcas zamiifolia    | .....C.T.A.....T.C.C.C.T.....               |         |                | .....T.....T.T.T.....                    |
| ALISarac Pistia stratiotes         | .....T.....C.T.A.....T.C.C.C.T.....         |         |                | .....T...G.....T.T.T.....                |
| ALISarac Orontium aquaticum        | .....T.....                                 |         |                | .....T.....C.....T.T.T.....              |
| ALISarac Peltandra virginica       | .....T.....                                 |         |                | .....T.....T.T.T.....                    |
| ALISarac Scindapsus aureus         | .....T.....                                 |         |                | .....T.....T.T.T.....                    |
| ALISarac Spathiphyllum wallisi     | .....T.....                                 |         |                | .....T.....T.T.T.....                    |
| DIOsdios Dioscorea                 | .....T.....                                 |         |                | .....T...A...C.....T.T.T.....            |
| ZINcos Costus                      | .....T.....                                 |         |                | .....T.....C.....T.T.T.....              |
| ZINlow Orchidantha fimbriata       | .....T.....                                 |         |                | .....T.....C.....T.T.T.....              |
| ZINstre Phenakospermum guyanense   | .....T.....                                 |         |                | .....T.....C.....T.T.T.....              |
| ZINstr Strelitzia                  | .....T.....                                 |         |                | .....T.....C.....T.T.T.....              |
| ZINzin Siphonochilus decorus       | .....C...T.....                             |         |                | .....T.....C.C.C.T.....T.T.T.....        |
| ZINzin Tamijia                     | .....T.....                                 |         |                | .....C...T.....T.....T.T.T.....          |
| ZINzin Plagiostachys               | .....T.....                                 |         |                | .....T.....T.....T.T.T.....              |
| ZINzin Aframomum                   | .....G.....                                 |         |                | .....T.....T.....T.T.T.....              |
| ZINzin Burbidgia                   | .....T.....                                 |         |                | .....T.....T.....T.T.T.....              |
| ZINzin Reidelia                    | .....T.....                                 |         |                | .....T.....T.....T.T.T.....              |
| ZINzin Curcuma                     | .....T.....                                 |         |                | .....T.....T.....T.T.T.....              |
| ZINzin Smithatris                  | .....TTT.....                               |         |                | .....T.....T.....T.T.T.....              |
| ZINzin Hedychium coronarium        | .....T.....C.T.A.....T.....T...Y.T.....     |         |                | .....T.....T.T.T.....                    |
| ZINzin Kaempferia                  | .....C.T.A.....T.....T.....                 |         |                | .....T.....T.T.T.....                    |
| ZINzin Boesenbergia                | .....T.....C.T.A.....T.....T.....           |         |                | .....T.....T.T.T.....                    |
| ZINzin Globba                      | .....T.....C.T.A.....T.....T.....           |         |                | .....T.....T.T.T.....                    |
| ZINzin Gagnepainia                 | .....T.....C.T.A.....T.....T.....           |         |                | .....T.....T.T.T.....                    |
| ZINnmar Saranthe leptostachya      | .....C.T.....                               |         |                | .....T.....C.....T.T.T.....              |
| ZINnmar Saranthe_sp                | .....C.T.....                               |         |                | .....T.....C.....T.T.T.....              |
| ZINnmar Marantal euconeura         | .....C.T.A.....T.C.C.C.T.....               |         |                | .....T.....C.....T.T.T.....              |
| ZINnmar Monotagma laxum            | .....C.T.A.....T.C.C.C.T.....               |         |                | .....T.....C.....T.T.T.....              |
| ZINnmar Ctenanthe setosa           | .....C.T.A.....T.C.C.C.T.....               |         |                | .....T.....C.....T.T.T.....              |
| ZINnmar Calathea warscewiczii      | .....T.....                                 |         |                | .....T.....C.....T.T.T.....              |
| ZINnmar Calathea metallica         | .....T.....                                 |         |                | .....T.....C.....T.T.T.....              |
| ZINnmar Calathea rufibarba         | .....T.....                                 |         |                | .....T.....C.....T.T.T.....              |
| ZINnmar Calathea crotalifera       | .....T.....                                 |         |                | .....T.....C.....T.T.T.....              |
| ZINnmar Thaumtococcus daniellii    | .....T.....                                 |         |                | .....T.....C.....T.T.T.....              |
| ZINnmar Maranta bicolor            | .....C.T.A.....T.C.C.C.T.....               |         |                | .....T.....C.....T.T.T.....              |
| ZINnmar Schumannianthus virgatus   | .....T.....                                 |         |                | .....T.....C.....T.T.T.....              |
| ZINnmar Schumannianthus dichotomus | .....T.....                                 |         |                | .....T.....C.....T.T.T.....              |
| ZINnmar Pleiostachya pruinosa      | .....T.....                                 |         |                | .....T.....C.....T.T.T.....              |
| ZINnmar Marantochloa purpurea      | .....T.....                                 |         |                | .....T.....C.....T.T.T.....              |
| ZINnmar Ischnosiphon heleneae      | .....T.....                                 |         |                | .....T.....C.....T.T.T.....              |
| ZINnmar Haumania                   | .....T.....                                 |         |                | .....T.....C.....T.T.T.....              |
| ZINnmar Donax canniformis          | .....T.....                                 |         |                | .....T.....C.....T.T.T.....              |
| ZINnmar Ataenidia conferta         | .....T.....                                 |         |                | .....T.....C.....T.T.T.....              |
| ZINnmar Stachyphrynium repens      | .....C.....                                 |         |                | .....T.....C.....T.T.T.....              |
| ZINnmar Cominsia gigantea          | .....T.....                                 |         |                | .....T.....C.....T.T.T.....              |
| ZINnmar Phrynium imbricatum        | .....T.....                                 |         |                | .....T...CT.....T.T.T.....               |
| ZINncan Canna paniculata           | .....T.....                                 |         |                | .....T.....C.....T.T.T.....              |
| ZINhel Heliconia irrasa            | .....T.....                                 |         |                | .....T.....C.....T.T.T.....              |
| ZINmus Musa nana                   | .....T.....C.T.A.....T.C.C.C.T.A.....       |         |                | .....T.....C.....T.T.T.....              |
| ZINmus Musella lasiocarpa          | .....T.....C.T.A.....T.C.C.C.T.A.....       |         |                | .....T.....C.....T.T.T.....              |
| ASPorc Calanthe                    | .....G.....                                 |         |                | .....T.....C.....T.T.T.....              |
| ASPorc Dendrobium                  | .....G.....                                 |         |                | .....A...T.....C.....T.T.T.....          |
| ASPorc Bulbophyllum                | .....G.....                                 |         |                | .....T.....C.....T.T.T.....              |
| ASPorc Ceratostylis                | .....G.....                                 |         |                | .....A...T.....C.....T.T.T.....          |
| ASPorc Dendrobium                  | .....G.....                                 |         |                | .....T.....C.....T.T.T.....              |
| PANpan Freycinetia                 | .....T.....                                 |         |                | .....T...A...C.....T.T.T.....            |
| ARECarec Chamaerops humilis        | .....T.....                                 |         |                | .....T.....C.....T.T.T.....              |
| ARECarec Phoenix dactylifera       | .....T.....                                 |         |                | .....T.....C.....T.T.T.....              |
| ARECarec Sabal palmetto            | .....T.....                                 |         |                | .....T.....C.....T.T.T.....              |
| POALpoac Aegilops colummaris       | .....A.....T.....                           |         |                | .....T.....T.....T.T.T.....              |





LAMPlant\_Plantago\_raoulii .....T..T. ....A... T..... .A..... .....A. .C.....T .....TA..C ..... .T..C...  
 LAMPlant\_Plantago\_spathulata .....T..T. ....A... T..... .A..... .....A. .C.....T .....TA..C ..... .T..C...  
 LAMPlant\_Plantago\_rigida .....T..T. ....A... T..... .A..... .....A. .C.....T .....TA..C ..... .T..C...  
 LAMPlant\_Plantago\_ounglumis .....T..T. ....A... T..... .A..... .....A. .C.....T .....TA..C ..... .T..C...  
 LAMPlant\_Plantago\_major .....T..T. ....A... T..... .A..... .....A. .C.....T .....TA..C ..... .T..C...  
 LAMPlant\_Plantago\_maxima .....T..T. ....CT.G... T..... .C..... .C.....T .....TA..A ..... .T..C...  
 LAMPlant\_Plantago\_media .....T..T. ....CT.G... T..... .A..... .....A. .C.....T .....TA..A ..... .T..C...  
 LAMPlant\_Plantago\_palmata .....T..T. ....C..A... T..... .A..... .....A. .C.....T .....TA..A ..... .T..C...  
 LAMPlant\_Plantago\_reniformis .....T..T. ....A... T..... .A..... .....A. .C.....T .....TA..A ..... .T..C...  
 LAMPlant\_Plantago\_rugelii .....T..T. ....A... T..... .A..... .....A. .C.....T .....TA..A ..... .T..C...  
 LAMPlant\_Plantago\_australis .....T..T. ....T. ....A... T..... .A..... .....A. .C.....T .....TA..A ..... .T..C...  
 LAMPlant\_Plantago\_tomentosa .....T..T. ....T. ....A... T..... .A..... .....A. .C.....T .....TA..A ..... .T..C...  
 LAMPlant\_Plantago\_trinitatis .....T..T. ....T. ....A... T..... .A..... .....A. .C.....T .....TA..A ..... .T..C...  
 LAMPlant\_Plantago\_tenuiflora .....A. .C.....T. A..C..G... T.....T. ....Y.....A. .T..Y..C.T .....TT..A ..... .A..C...

Printed: Tuesday, May 27, 2008 12:15:56 PM

#NEXUS

```

BEGIN DATA;
  DIMENSIONS  NTAX=228  NCHAR=2;
  FORMAT MISSING=? GAP=- ;
  CHARSTATELABELS
    1 intron, 2 CCT
  ;

```

MATRIX

```

[           ]
[           ]

```

|                  |    |
|------------------|----|
| EarlyAngiosperms | 00 |
| Dysoxylum        | 11 |
| Melia            | 11 |
| Leitneria        | 00 |
| Rutaceae         | 00 |
| Sapindaceae      | 00 |
| Rhus             | 00 |
| Bursera          | 11 |
| Shorea           | 11 |
| Brassicales      | 00 |
| Crossosomatales  | 00 |
| Geraniales       | 00 |
| Myrtales         | 00 |
| Salicaceae_etal  | 00 |
| Moutrouzieria    | 11 |
| Hybanthus        | 11 |
| Viola            | 11 |
| Malpighia        | 11 |
| Linum            | 11 |
| Euphorbia        | 11 |
| Hura             | 11 |
| Croton           | 11 |
| Codiaeum         | 11 |
| Hevea            | 11 |
| Acalypha         | 11 |
| Phyllanthus      | 11 |
| Breynia          | 11 |
| Oxaliales        | 00 |
| Brexia           | 11 |
| Fabaceae         | 00 |
| Discaria         | 00 |
| Nesiota          | 10 |
| Phylla           | 10 |
| Ceanothus        | 00 |
| Trymalium        | 00 |
| Ziziphus         | 11 |
| Paliurus         | 11 |
| Hovenia          | 11 |
| Bathiorhamnus    | 10 |
| Ventilago        | 00 |
| Maesopsis        | 10 |
| Rhamnella        | 10 |
| _Condalia        | 00 |

---

---

|                     |    |
|---------------------|----|
| Karwinskia          | 00 |
| Frangula            | 10 |
| Rhamnus             | 10 |
| Elaeagnus           | 00 |
| Boehmeria           | 00 |
| Pilea               | 11 |
| Humulus             | 00 |
| Luffa               | 00 |
| Cucurbita           | 11 |
| Melothria           | 11 |
| Cucumis             | 11 |
| Fagales             | 00 |
| Lepionurus          | 11 |
| Dionaea             | 11 |
| Tamarix             | 00 |
| Plumbago_etal       | 00 |
| OtherCaryophyllales | 00 |
| Vitis               | 00 |
| Saxifragales        | 00 |
| Buxaceae            | 00 |
| Trochodendrales     | 00 |
| Proteales           | 00 |
| Ranunculales        | 00 |
| Chloranthaceae      | 00 |
| Ceratophyllum       | 00 |
| Laurales            | 00 |
| Myristicaceae       | 11 |
| Magnoliaceae        | 00 |
| Eupomatiaceae       | 00 |
| Annona              | 00 |
| Asimina             | 11 |
| Polyalthia          | 00 |
| Cananga             | 00 |
| 'anthurium+'        | 00 |
| Zantedeschia        | 00 |
| Zamioculcas         | 11 |
| Dieffenbachia       | 00 |
| Philodendron        | 11 |
| Peltandra           | 00 |
| Pistia              | 11 |
| Arisaema            | 11 |
| Xanthosoma          | 11 |
| Amorphophallus      | 11 |
| Orontium            | 00 |
| Dioscorea           | 00 |
| Asparagales         | 00 |
| Poales              | 00 |
| Arecaceae           | 00 |
| Musa                | 11 |
| Musella             | 11 |
| 'Strelizia+'        | 00 |
| Heliconia           | 00 |
| Siphonochilus       | 11 |
| Tamijia             | 00 |
| Globba              | 11 |
| Gagnepainia         | 11 |
| Boesenbergia        | 11 |

---

---

|                    |    |
|--------------------|----|
| Hedychium          | 11 |
| Kaempferia         | 11 |
| Smithatris         | 00 |
| Curcuma            | 00 |
| Afamomum_etal      | 00 |
| Costus             | 00 |
| Monotagma          | 11 |
| 'Ischnosiphon+'    | 00 |
| Haumania           | 00 |
| Sarcophyllum_etal  | 00 |
| Stachyphrynum_etal | 00 |
| MarantaClade       | 11 |
| Thalia_etal        | 00 |
| Canna              | 00 |
| Canellales         | 00 |
| Paulownia          | 11 |
| Rehmannia          | 11 |
| Petrea             | 00 |
| Sesamum            | 11 |
| Callicarpa         | 00 |
| Lamiaceae          | 11 |
| Tecomaria          | 00 |
| Catalpa            | 11 |
| Deplanchea_etal    | 00 |
| Pandorea           | 00 |
| Acanthaceae        | 11 |
| Celsia             | 11 |
| Scrophularia       | 11 |
| Verbascum          | 00 |
| Myoporum           | 00 |
| Buddleja           | 00 |
| Drymonia           | 11 |
| Nematanthus        | 11 |
| Streptocarpus      | 00 |
| Calceolaria        | 11 |
| Jasminum           | 11 |
| Ipomoea            | 11 |
| Solanaceae         | 00 |
| Ehretia            | 11 |
| Heliotropium       | 11 |
| Borago             | 00 |
| Brunnera           | 00 |
| 'Galium+'          | 00 |
| Coffea             | 11 |
| Psilanthus         | 11 |
| Calycosiphonia     | 11 |
| Bertiera           | 00 |
| 'Gardenia+'        | 00 |
| Ixora              | 11 |
| Ixora2             | 11 |
| Scyphiphora        | 00 |
| Alstonia           | 11 |
| Neisosperma        | 11 |
| Ochrosia           | 11 |
| Vinca              | 11 |
| Alyxia             | 11 |
| Carissa            | 00 |

---

---

|                   |    |
|-------------------|----|
| Nerium            | 11 |
| Hoya              | 11 |
| Strychnos         | 11 |
| Nymphoides        | 00 |
| Asterales         | 00 |
| Dipsacales        | 00 |
| Hydrocotyle       | 11 |
| Daucus            | 00 |
| Ilex              | 11 |
| Chamaedaphne      | 00 |
| Andromeda         | 00 |
| Pyrola            | 11 |
| Symplocos         | 11 |
| Diospyros         | 11 |
| Phlox             | 00 |
| Barringtonia      | 11 |
| _Cymbalaria       | 00 |
| Antirrhinum       | 00 |
| Sibthorpia        | 11 |
| Hippuris          | 00 |
| Callitriche       | 11 |
| Hebe              | 11 |
| Veronica          | 11 |
| Aragoa            | 11 |
| Plantagoplantago  | 01 |
| Plantagocoronopus | 11 |
| Psarcophylla_etal | 11 |
| Pbellardi_etal    | 01 |
| Plagopus_etal     | 11 |
| Lactoris_etal     | 00 |
| Peperomia_etal    | 11 |
| Piper             | 00 |
| Saururus          | 00 |
| Commelinales      | 0? |
| Liliales          | 0? |
| Lemna             | 0? |
| Hydrocharitaceae  | 0? |
| Degeneria         | 0? |
| Galbulimima       | 0? |
| Cornales          | 0? |
| Impatiens         | 0? |
| Sapotaceae        | 0? |
| Myrsinaceae       | 0? |
| Halesia           | 0? |
| Sarraceniaceae    | 0? |
| Clethra           | 0? |
| Cyrilla           | 0? |
| Citronella        | 0? |
| 'Hedera+'         | 0? |
| Polyscias         | 0? |
| Garryales         | 0? |
| Neuburgia         | 0? |
| Olea_etal         | 0? |
| Forsythia         | 0? |
| Coronanthera      | 0? |
| Byblis            | 0? |
| Lentibulariaceae  | 1? |



Printed: Tuesday, May 27, 2008 12:15:56 PM

---

---

```
Sabia                0?  
Tetracera           0?  
Malvaceae           0?  
Canarium            0?  
Salaciopsis         0?  
Hippocrateaceae    0?  
Cleistanthus        0?  
Passiflora          0?  
Hypericum           0?  
Prunus              0?  
Ulmus               0?  
Datisca             0?  
Coriaria            0?  
Begonia             0?  
;  
END;
```

```
BEGIN ASSUMPTIONS;  
  OPTIONS  DEFTYPE=unord PolyTcount=MINSTEPS ;  
END;
```

```
BEGIN TREES;
```

```
  TRANSLATE
```

```
  1  EarlyAngiosperms,  
  2  Dysoxylum,  
  3  Melia,  
  4  Leitneria,  
  5  Rutaceae,  
  6  Sapindaceae,  
  7  Rhus,  
  8  Bursera,  
  9  Shorea,  
 10  Brassicales,  
 11  Crossosomatales,  
 12  Geraniales,  
 13  Myrtales,  
 14  Salicaceae_etal,  
 15  Mountrouziera,  
 16  Hybanthus,  
 17  Viola,  
 18  Malpighia,  
 19  Linum,  
 20  Euphorbia,  
 21  Hura,  
 22  Croton,  
 23  Codiaeum,  
 24  Hevea,  
 25  Acalypha,  
 26  Phyllanthus,  
 27  Breynia,  
 28  Oxaliales,  
 29  Brexia,  
 30  Fabaceae,  
 31  Discaria,
```

32 Nesiota,  
33 Phyllica,  
34 Ceanothus,  
35 Trymalium,  
36 Ziziphus,  
37 Paliurus,  
38 Hovenia,  
39 Bathiorhamnus,  
40 Ventilago,  
41 Maesopsis,  
42 Rhamnella,  
43 \_Condalia,  
44 Karwinskia,  
45 Frangula,  
46 Rhamnus,  
47 Elaeagnus,  
48 Boehmeria,  
49 Pilea,  
50 Humulus,  
51 Luffa,  
52 Cucurbita,  
53 Melothria,  
54 Cucumis,  
55 Fagales,  
56 Lepionurus,  
57 Dionaea,  
58 Tamarix,  
59 Plumbago\_etal,  
60 OtherCaryophyllales,  
61 Vitis,  
62 Saxifragales,  
63 Buxaceae,  
64 Trochodendrales,  
65 Proteales,  
66 Ranunculales,  
67 Chloranthaceae,  
68 Ceratophyllum,  
69 Laurales,  
70 Myristicaceae,  
71 Magnoliaceae,  
72 Eupomatiaceae,  
73 Annona,  
74 Asimina,  
75 Polyalthia,  
76 Cananga,  
77 'anthurium+',  
78 Zantedeschia,  
79 Zamiodulcas,  
80 Dieffenbachia,  
81 Philodendron,  
82 Peltandra,  
83 Pistia,  
84 Arisaema,  
85 Xanthosoma,  
86 Amorphophallus,  
87 Orontium,  
88 Dioscorea,

---

89 Asparagales,  
90 Poales,  
91 Arecaceae,  
92 Musa,  
93 Musella,  
94 'Strelizia+',  
95 Heliconia,  
96 Siphonochilus,  
97 Tamijia,  
98 Globba,  
99 Gagnepainia,  
100 Boesenbergia,  
101 Hedychium,  
102 Kaempferia,  
103 Smithatris,  
104 Curcuma,  
105 Afamomum\_etal,  
106 Costus,  
107 Monotagma,  
108 'Ischnosiphon+',  
109 Haumania,  
110 Sarcophyllum\_etal,  
111 Stachyphrynum\_etal,  
112 MarantaClade,  
113 Thalia\_etal,  
114 Canna,  
115 Canellales,  
116 Paulownia,  
117 Rehmannia,  
118 Petrea,  
119 Sesamum,  
120 Callicarpa,  
121 Lamiaceae,  
122 Tecomaria,  
123 Catalpa,  
124 Deplanchea\_etal,  
125 Pandorea,  
126 Acanthaceae,  
127 Celsia,  
128 Scrophularia,  
129 Verbascum,  
130 Myoporum,  
131 Buddleja,  
132 Drymonia,  
133 Nematanthus,  
134 Streptocarpus,  
135 Calceolaria,  
136 Jasminum,  
137 Ipomoea,  
138 Solanaceae,  
139 Ehretia,  
140 Heliotropium,  
141 Borago,  
142 Brunnera,  
143 'Galium+',  
144 Coffea,  
145 Psilanthus,

146 Calycosiphonia,  
147 Bertiera,  
148 'Gardenia+',  
149 Ixora,  
150 Ixora2,  
151 Scyphiphora,  
152 Alstonia,  
153 Neisosperma,  
154 Ochrosia,  
155 Vinca,  
156 Alyxia,  
157 Carissa,  
158 Nerium,  
159 Hoya,  
160 Strychnos,  
161 Nymphoides,  
162 Asterales,  
163 Dipsacales,  
164 Hydrocotyle,  
165 Daucus,  
166 Ilex,  
167 Chamaedaphne,  
168 Andromeda,  
169 Pyrola,  
170 Symplocos,  
171 Diospyros,  
172 Phlox,  
173 Barringtonia,  
174 \_Cymbalaria,  
175 Antirrhinum,  
176 Sibthorpia,  
177 Hippuris,  
178 Callitriche,  
179 Hebe,  
180 Veronica,  
181 Aragoa,  
182 Plantagoplantago,  
183 Plantagocoronopus,  
184 Psarcophylla\_etal,  
185 Pbellardi\_etal,  
186 Plagopus\_etal,  
187 Lactoris\_etal,  
188 Peperomia\_etal,  
189 Piper,  
190 Saururus,  
191 Commelinales,  
192 Liliales,  
193 Lemna,  
194 Hydrocharitaceae,  
195 Degeneria,  
196 Galbulimima,  
197 Cornales,  
198 Impatiens,  
199 Sapotaceae,  
200 Myrsinaceae,  
201 Halesia,  
202 Sarraceniaceae,

- 203 Clethra,
- 204 Cyrilla,
- 205 Citronella,
- 206 'Hedera+',
- 207 Polyscias,
- 208 Garryales,
- 209 Neuburgia,
- 210 Olea\_etal,
- 211 Forsythia,
- 212 Coronanthera,
- 213 Byblis,
- 214 Lentibulariaceae,
- 215 Sabia,
- 216 Tetracera,
- 217 Malvaceae,
- 218 Canarium,
- 219 Salaciopsis,
- 220 Hippocrateaceae,
- 221 Cleistanthus,
- 222 Passiflora,
- 223 Hypericum,
- 224 Prunus,
- 225 Ulmus,
- 226 Datisca,
- 227 Coriaria,
- 228 Begonia

```

;
TREE * cladogram = [&R]
(1,(((((((((((53,54),52),51),226),227),228),55),((((49,48),50),225)
,47,((((45,46),((43,44),
42)),41),40),39,((36,37),38),34,35,(32,33),31))),224),30,(((22,23),(
20,21),24,25),((26,27),221
),19,18,((16,17),222),((15,223),14),28,(220,(219,29))),13,12,11,((((2
,3),4,5,6),7,(218,8)),(217
,9)),10)),61,62,216,((((((((168,169),204),203),202),167,(201,170)),(
199,(200,171))),172,173),
198),197,((((((((128,127),129),130),131),126,(123,124,122,125),(
121,120),119,118,(117,116),(
214,213)),((((180,179),(((184,185),186),182,183)),181)),((178,177),
176)),(175,174))),212,(133
,132),134)),135,(211,(210,136))),138,137),(142,141,140,139),(((((((
159,158),157),156),((154,
153),155)),152),(209,160)),161),(((150,149),151),((146,(145,144)),147
,148)),143))),208),((165,
(206,207,164)),163,162),(205,166))),((58,59,57),60),56)),63,64),65,
215,66),((((((((93,92),94,
95,((((((((104,103),((101,102),100)),(99,98)),105),97),96),106),((113
,(111,112)),(110,(109,(108
,107))),114))),191),91),90),89),192),88),194,(((((((86,85),((84,83),
82)),81,80),79,78),77),193
),87))),67,68,((115,((190,(189,188)),187)),(69,(70,195,(71,(196,(72,((
74,73),75),76))))))));

```

END;
